# Supplementary material
Source: Elsevier journal article supplement (https://www.sciencedirect.com/science/article/pii/S2530016420300914)
Supplement: mmc1 [file S2530016420300914:mmc1.doc]

Table 1 Water intake and IBD.

| Author | Type of study | Vitro animals–humans | Subjects | Dietary products used | Results |
| --- | --- | --- | --- | --- | --- |
| Aamodt et al., 200821 | A cohort study | Humans | 843 participants were recruited from a population-based incidence study in 4 counties in southeastern Norway during 1990–1993 | The Drinking Water Act addresses the service of delivering the drinking water and its standards of quality to ensure safe and healthy drinking water for the population. The waterworks must report the quality of their raw water and purified water to the Norwegian Institute of Public Health | They used data from a population-based cohort recruited in southeastern Norway and a registry of water quality derived from Norwegian waterworks that contained measurements of iron, aluminum, acidity (pH), color, turbidity, and coliform bacteria. The authors found that risk of developing inflammatory bowel disease, including ulcerative colitis and Crohn’s disease, was associated with high iron content. The relative risk of developing inflammatory bowel disease increased by 21% (95% confidence interval: 9, 34) when the iron content in the drinking water increased by 0.1░mg/l. They found no association between the diseases and aluminum in the water, color of the water, and turbidity of the water. The authors suggest that the observations can be explained by 2 mechanisms. First, high iron concentration works as a catalyst for oxidative stress, which will cause inflammation and/or increase the rate of cell mutations. Second, iron content stimulates the growth of bacteria and increases the likelihood of inappropriate immune responses in genetically predisposed individuals |
| Abubakar et al., 200724 | A case–control study | Humans | A total of 218 patients with Crohn’s disease recruited from nine hospitals in England and 812 controls recruited from the community | Patients and controls complete a short questionnaire for evaluation of proxy measures of potential exposure to MAP in water and dairy products | In this case–control study (1999–2004), the authors assessed the possible role of drinking water and dairy products potentially contaminated with MAP in the etiology of Crohn’s disease. A total of 218 patients with Crohn’s disease recruited from nine hospitals in England and 812 controls recruited from the community completed a short questionnaire for evaluation of proxy measures of potential exposure to MAP. Logistic regression showed no significant association with measures of potential contamination of water sources with MAP, water intake, or water treatment. Multivariate analysis showed that consumption of pasteurized milk (per kg/month: odds ratio (OR)░=░0.82, 95% confidence interval (CI): 0.69, 0.97) was associated with a reduced risk of Crohn’s disease. Meat intake (per kg/month: OR░=░1.40, 95% CI: 1.17, 1.67) was associated with a significantly increased risk of Crohn’s disease, whereas fruit consumption (per kg/month: OR░=░0.78, 95% CI: 0.67, 0.92) was associated with reduced risk. This study does not support a role for water or dairy products potentially contaminated with MAP in the etiology of Crohn’s disease. The observed association with meat and the negative association with pasteurized milk need further study |
| Brown et al., 201123 | Existing dietary guidelines for Crohn’s disease and ulcerative colitis |  |  |  |  |
| Gil et al., 201522 | Review |  |  |  | The role of diet quality and physical activity in reducing the progression of chronic disease is becoming increasingly important. Dietary Quality Indices or Indicators (DQIs) are algorithms aiming to evaluate the overall diet and categorize individuals according to the extent to which their eating behavior is ``healthy''. Predefined indexes assess dietary patterns based on current nutrition knowledge and they have been developed primarily for nutritional epidemiology to assess dietary risk factors for non-communicable diseases. There are many different types of DQIs. There are three major categories of DQIs: (a) nutrient-based indicators; (b) food/food group based indicators; and (c) combination indexes, the vast majority of DQIs, which often include a measure of diet variety within and across food groups, a measure of adequacy. The Mediterranean Lifestyle (MEDLIFE) index has been recently created based on the current Spanish Mediterranean food guide pyramid and it includes both the assessment of food consumption directly related to the Mediterranean diet, physical activity and rest and other relevant cultural information. However, a global HLI should consider, based on the Iberoamerican Nutrition Foundation (FINUT) Pyramid of Healthy Lifestyles, in addition to food groups and nutrients, selected items on food safety, *e.g*., consumption rate of proceed foods, food handling, preparation and storage and access to drinking water, selected food habits, including alcoholic beverage and salt consumption patterns, purchase of seasonal and local foods, home cooking and conviviality, as well as patterns of physical activity, sedentary and rest habits and some selected sociocultural habits, particularly those related to food selection, religious beliefs and socializing with friends |
| Van Kruiningen et al., 200520 | Clinical trial | Humans | Twenty-one families with 3 or more affected first-degree relatives were studied, together with 10 matched control families. There were 74 patients with CD, 84 unaffected family members, and 59 controls |  | There were significantly more smokers in the patients and their relatives than in controls. Patients had more appendicitis during adolescence, ate less oats, rye, and bran than controls, and consumed more unpasteurized cheese. Patients drank significantly less tap water and more well water than controls. Clustering of cases in time occurred in 13 of the 21 affected families |
| Waddell et al., 201625 | Review |  |  |  | The results of this review indicate that ruminant populations from around the globe are infectedwith *M. paratuberculosis* and many non-ruminant species have also been found to carry or be infected with *M. paratuberculosis*. Several potential sources for human exposure to *M. paratuberculosis* were identified; however there remain important gaps in quantitative information on the prevalence and concentration of *M. paratuberculosis* in contaminated sources of exposure. This information is critical to understanding the risk of exposure, opportunities for risk mitigation interventions and modeling exposures to distill the importance of various sources of human exposure to *M. paratuberculosis* including direct contact with animals and the environment as well as consumption of contaminated foods and water. Results of thisstudy may be used to prioritize future research and to support evidence-informed decision-making on the *M. paratuberculosis* issue |
|  |  |  |  |  |  |

Table 2 Carbohydrates intake and IBD.

| Author | Type of study | Vitro animals–humans | Subjects | Dietary products used | Results |
| --- | --- | --- | --- | --- | --- |
| Casella et al., 201539 | Clinical trial |  |  |  | The possibility of the presence of CD in IBD should be considered in IBD patients with long-term iron deficiency anemia (IDA) not responsive to iron supplementation. Non-celiac gluten sensitivity (NCGS) is characterized by intestinal and extra intestinal symptoms due to the ingestion of gluten-containing food in subject without CD and/or wheat allergy. Patients with Crohn's disease and SR-NCGS were more significantly affected by joint pains compared to UC patients (50% versus 11.1%). In Crohn's patients, a higher percentage of fatigue (50% versus 38.9%) and headache (27.3% versus 22.2%) was evident |
| Chan et al., 201426 | Multicenter prospective study | Humans | 401,326 men and women were recruited between 1991 and 1998 | Dietary intakes of carbohydrate, sugar, and starch adjusted for total energy intake, body mass index, and smoking were measured using validated food frequency questionnaires | One hundred ten participants developed CD, and 244 participants developed UC during follow-up. The adjusted odds ratio for the highest versus the lowest quintiles of total carbohydrate intake for CD was 0.87, 95% CI: 0.24–3.12 and for UC 1.46, 95% CI: 0.62–3.46, with no significant trends across quintiles for either (CD, *P* trend░=░0.70; UC, *P* trend░=░0.41). Similarly, no associations were observed with intakes of total sugar (CD, *P* trend░=░0.50; UC, *P* trend░=░0.71) or starch (CD, *P* trend░=░0.69; UC, *P* trend░=░0.17) |
| Croagh et al., 200730 | A pilot study | Humans | Fifteen patients without a colon (13 pouch, 2 IRA) had dietary and symptomatic evaluation before and during a low FODMAP diet | A low FODMAP diet | Of 8 patients with a breath hydrogen response to lactulose, 7 had fructose malabsorption, 3 with lactose malabsorption, and 1 had lactose malabsorption alone. Five of 7 studied retrospectively improved stool frequency (from median 8 to 4 per day; *P*░=░0.02), this being sustained over 0.5–3 years of follow-up. Five of 8 patients completed a prospective arm of the study. One patient had sustained improvement in stool frequency and 1 had reduced wind production. Overall, none of 8 patients who had pouchitis improved. In contrast, median daily stool frequency fell from 8 to 4 (*P*░=░0.001) in the 7 without pouchitis. The degree of change in FODMAP intake also predicted response. There was a tendency for pouchitis to be associated with low baseline FODMAP intake |
| Durchschein et al., 201632 | Review | Humans | Patients with inflammatory bowel diseases (IBD) |  | Studies in UC have shown a beneficial effect in selected patients. For patients with pouchitis, antibiotic treatment followed by probiotics, like Lactobacillus GG, is effective. When probiotics are used, the risk of bacterial translocation and subsequent bacteremia has to be considered. More understanding of the normal intestinal microflora, and better characterization of probiotic strains at the phenotypic and genomic levels is needed as well as clarification of the mechanisms of action in different clinical settings. A FODMAP reduced diet may improve symptoms in IBD |
| Gearry et al., 200931 | A pilot study | Humans | 52 consecutive patients with Crohn's disease and 20 with ulcerative colitis | A low FODMAP diet | Up to 70% of patients were adherent to the diet. Approximately one in two patients responded (defined as improvement of at least 5 out of 10 in overall symptoms). Overall abdominal symptoms, abdominal pain, bloating, wind and diarrhea improved in patients with Crohn's disease and ulcerative colitis (*P*░<░0.02 for all), but constipation did not. For Crohn's disease, efficacy was associated with dietary adherence (*P*░=░0.033) and inefficacy with non-adherence (*P*░=░0.013). Sustained response was associated with post-secondary education and working 35░h per week or less (*P*░<░0.03) |
| Gibson and Shepherd, 201029 | Review | Humans | Patients with functional gastrointestinal symptoms | A low FODMAP diet | The restriction of FODMAPs intake globally (as opposed to individually) reduces functional gut symptoms, an effect that is durable and can be reversed by their reintroduction into the diet (as shown by a randomized placebo-controlled trial). The diet has a high compliance rate. However, it requires expert delivery by a dietitian trained in the diet. Breath hydrogen tests are useful to identify individuals who can completely absorb a load of fructose and lactose so that dietary restriction can be less stringent |
| Kakodkar et al., 201533 | A case study | Humans | A cohort of 50 patients with inflammatory bowel disease in remission | The Specific Carbohydrate Diet (SCD) | Our survey results suggest that SCD can potentially be an effective tool in the management of some patients with IBD and specifically in patients with colonic and ileocolonic CD who made up the majority of the study group. A highly educated group of patients follow the SCD; all but one of the adults in our study had a college or graduate degree. Results also suggest that in some patients with moderate to severe disease who follow this diet, discontinuation of immunosuppressive agents have been feasible |
| Khandalavala and Nirmalraj, 201534 | Case report | Humans | A 73-year-old female of Asian origin was diagnosed with ulcerative colitis (UC) after initial gastrointestinal symptoms of abdominal pain and bloody diarrhea | The Specific Carbohydrate Diet (SCD). | Following this highly restricted diet, within a period of 3–6 months, improvement was noted, and within a year, no abdominal pain or diarrhea were present, and she returned to her baseline functioning and career. Two years later, re-peat colonoscopy showed resolution of the pancolitis, confirmed with microscopic evaluation. Successful use of the SCD in children with UC has been documented. We describe previously unreported, highly beneficial results with both symptomatic and clinical improvement and complete remission of UC in an adult female with the SCD |
| Knight-Sepulveda et al., 201528 | Review |  |  |  | Patients with inflammatory bowel disease (IBD) are increasingly becoming interested in nonpharmacologic approaches to managing their disease. One of the most frequently asked questions of IBD patients is what they should eat. The role of diet has become very important in the prevention and treatment of IBD. Although there is a general lack of rigorous scientific evidence that demonstrates which diet is best for certain patients, several diets—such as the low–fermentable oligosaccharide, disaccharide, monosaccharide, and polyol diet; the specific carbohydrate diet; the anti-inflammatory diet; and the Paleolithic diet—have become popular. This article discusses the diets commonly recommended to IBD patients and reviews the supporting data |
| Herfarth et al., 201440 | A cohort study | Humans | 1647 patients with inflammatory bowel diseases (IBD) | A gluten-free diet (GFD) without an underlying diagnosis of celiac disease | A diagnosis of celiac disease and non-celiac gluten sensitivity were reported by 10 (0.6%) and 81 (4.9%) respondents, respectively. Three hundred fourteen (19.1%) participants reported having previously tried a GFD and 135 (8.2%) reported current use of GFD. Overall 65.6% of all patients, who attempted a GFD, described an improvement of their gastrointestinal symptoms and 38.3% reported fewer or less severe IBD flares. In patients currently attempting a GFD, excellent adherence was associated with significant improvement of fatigue (*P*░<░0.03) |
| Hou et al., 201127 | A systematic review | Humans | 2609 IBD patients (1269 Crohn's disease (CD) and 1340 ulcerative colitis (UC) patients) and over 4000 controls |  | Nineteen studies were included. Studies reported a positive association between high intake of saturated fats, monounsaturated fatty acids, total polyunsaturated fatty acids (PUFAs), total omega-3 fatty acids, omega-6 fatty acids, mono- and disaccharides, and meat and increased subsequent CD risk. Studies reported a negative association between dietary fiber and fruits and subsequent CD risk. High intakes of total fats, total PUFAs, omega-6 fatty acids, and meat were associated with an increased risk of UC. High vegetable intake was associated with a decreased risk of UC |
| Olendzki et al., 201436 | A case series report | Humans | Forty patients with IBD | The Anti-Inflammatory Diet (IBD-AID) is a nutritional regimen for inflammatory bowel disease (IBD) that restricts the intake of certain carbohydrates, includes the ingestion of pre- and probiotic foods, and modifies dietary fatty acids to demonstrate the potential of an adjunct dietary therapy for the treatment of IBD | Of the 40 patients with IBD, 13 patients chose not to attempt the diet (33%). Twenty-four patients had either a good or very good response after reaching compliance (60%), and 3 patients’ results were mixed (7%). Of those 11 adult patients who underwent further medical record review, 8 with CD, and 3 with UC, the age range was 19–70 years, and they followed the diet for 4 or more weeks. After following the IBD-AID, all (100%) patients were able to discontinue at least one of their prior IBD medications, and all patients had symptom reduction including bowel frequency. The mean baseline HBI was 11 (range 1–20), and the mean follow-up score was 1.5 (range 0–3). The mean baseline MTLWSI was 7 (range 6–8), and the mean follow-up score was 0. The average decrease in the HBI was 9.5 and the average decrease in the MTLWSI was 7 |
| Oxford et al., 201338 | A case–control study | Humans | 51 patients with IBD [22 ulcerative colitis (UC), 1 indeterminate colitis, 28 Crohn’s disease (CD)] and celiac disease |  | There was no significant difference in the age, gender, or ethnicity between celiac-IBD and controls. Pancolitis was more common in celiac-UC patients as compared to controls (odds ratio 3.30, 95% confidence interval 1.05–21.50). There was also a trend toward increased use of immunomodulators among celiac-UC patients than in non-celiac UC controls (OR 2.83, 95% CI: 0.95–8.48). No phenotypic differences were found in celiac-CD patients. There were no significant differences in IBD-related medication usage, hospitalizations, or surgeries |
| Pascual et al., 201437 | Review |  |  |  | Recent findings demonstrate the common genetic basis for many immune-mediated diseases, and consequently, the partially shared pathogenesis. We collected these findings and reviewed the extension of these overlaps to other disease characteristics. Two autoimmune diseases were selected that also share the specific target organ, the bowel. The etiology and immunopathogenesis of both conditions characterized by chronic intestinal inflammation, inflammatory bowel disease (IBD) and celiac disease (CeD), are not completely understood. Both are complex diseases with genetics and environment contributing to dysregulation of innate and adaptive immune responses, leading to chronic inflammation and disease. CeD constitutes a particular disease because the main environmental and genetic triggers are largely known. |
| Suskind et al., 201435 | A retrospective chart review | Humans | Ten pediatric patients with IBD were identified | The SCD dietary therapy from January 2005 to December 2012. | Seven children with Crohn disease receiving the SCD and no immunosuppressive medications were retrospectively evaluated. Duration of the dietary therapy ranged from 5 to 30 months, with an average of 14.6░±░10.8 months. Although the exact time of symptom resolution could not be determined through chart review, all symptoms were notably resolved at a routine clinic visit 3 months after initiating the diet. Each patient’s laboratory indices, including serum albumin, C-reactive protein, hematocrit, and stool calprotectin, either normalized or significantly, improved during follow-up clinic visits |
| Zanwar et al., 201641 | a prospective, randomized, double blinded placebo controlled trial | Humans | Patients aged > 16 years, with symptoms of IBS as per the Rome III criteria, and willing to adhere to the prescribed diet | The participants were administered a gluten-free diet for 4 weeks and were asked to complete a symptom-based questionnaire to assess their overall symptoms, abdominal pain, bloating, wind, and tiredness on the visual analog scale (0–100) at the baseline and every week thereafter. The participants who showed improvement were randomly assigned to one of two groups to receive either a placebo (gluten-free breads) or gluten (whole cereal breads) as a rechallenge for the next 4 weeks | In line with the protocol analysis, 60 patients completed the study. The overall symptom score on the visual analog scale was significantly different between the two groups (*P*░<░0.05). Moreover, the patients in the gluten intervention group scored significantly higher in terms of abdominal pain, bloating, and tiredness (*P*░<░0.05), and their symptoms worsened within 1 week of the rechallenge |

Table 3 Fruits and vegetables intacke and IBD.

| Author | Type of study | Vitro animals–humans | Subjects | Dietary products used | Results |
| --- | --- | --- | --- | --- | --- |
| Anhê et al., 201551 | Review |  |  |  | Trillions of microorganisms inhabit the human body, strongly colonizing the gastro-intestinal tract and outnumbering our own cells. High-throughput sequencing techniques and new bioinformatic tools have enabled scientists to extend our knowledge on the relationship between the gut microbiota and host’s physiology. Disruption of the ecological equilibrium in the gut (*i.e.*, dysbiosis) has been associated with several pathological processes, including obesity and its related comorbidities, with diet being a strong determinant of gut microbial balance. In this review, we discuss the potential prebiotic effect of polyphenol-rich foods and extracts and how they can reshape the gut microbiota, emphasizing the novel role of the mucin-degrading bacterium Akkermansia muciniphila in their metabolic benefits |
| Boussenna et al., 201652 | Rats model study | Animals | Five-week-old male Wistar rats (160–180░g) | Rats were fed for 21 days with a semi-synthetic diet enriched with a GPE (Alicante-S, Alicante-P or Pinot-S) and colitis was induced by DSS administration in drinking water (40░g░L1) during the last 7 days of experimentation | GPEs attenuated clinical signs and colon shortening and Alicante GPEs limited histological lesions induced by DSS. GPEs curbed the increase inmyeloperoxidase activity and modulated antioxidant enzyme activities. Moreover, GPEs prevented the DSS-induced increase in pro-inflammatory cytokine levels and the up-regulation of various genes implicated in colitis such as intercellular adhesion molecule 1 (ICAM-1) and matrix metalloproteinase 9 (MMP-9) |
| Cohen et al., 201348 | Clinical study | Humans | The final cohort included 6768 patients categorized into: CD without an ostomy or pouch (CD), UC without an ostomy or pouch (UC), CD with an ostomy (CD-ostomy), and UC with a pouch (UC-pouch) | We used a semi-quantitative food frequency questionnaire to measure dietary consumption patterns and open-ended questions to elicit responses from patients about food items they believe ameliorate or exacerbate IBD | Yogurt, rice, and bananas were more frequently reported to improve symptoms whereas non-leafy vegetables, spicy foods, fruit, nuts, leafy vegetables, fried foods, milk, red meat, soda, popcorn, dairy, alcohol, high-fiber foods, corn, fatty foods, seeds, coffee, and beans were more frequently reported to worsen symptoms. Compared to CD patients, CD ostomy patients reported significantly greater consumption of cheese (odds ratio [OR] 1.56, 95% CI 1.03–2.36), sweetened beverages (OR 2.14, 95% CI 1.02–1.03), milk (OR 1.84, 95% CI 1.35–2.52), pizza (OR1.57, 95% CI 1.12–2.20), and processed meats (OR 1.40; 95% CI 1.04–1.89) |
| Impellizzeri et al., 201556 | Mice model study | Animals | Male adult CD1 mice. Animals were randomly divided into several groups (*n*░=░10 for each group) | Bergamot juice (BJe) was administered daily orally (at 5, 10 and 20░mg/kg) | Four days after DNBS administration, colon nuclear factor NF-B translocation and MAP kinase phospho-JNK activation were increased as well as cytokine production such as tumor necrosis factor (TNF)-a and interleukin (IL)-1b. Neutrophil infiltration, by myeloperoxidase (MPO) activity, in the mucosa was associated with up-regulation of adhesion molecules (ICAM-1 and P-selectin). Immunohistochemistry for nitrotyrosine and poly ADP-ribose (PAR) also showed an intense staining in the inflamed colon. Treatment with BJe decreased the appearance of diarrhea and body weight loss. This was associated with a reduction in colonic MPO activity. BJe reduced nuclear NF-B translocation, p-JNK activation, the pro-inflammatory cytokines release, the appearance of nitrotyrosine and PAR in the colon and reduced the up-regulation of ICAM-1 and P-selectin. In addition, colon inflammation was also associated with apoptotic damage. Treatment with BJe caused a decrease of pro-apoptotic Bax expression and an increase of anti-apoptotic Bcl-2 expression |
| Larrosa et al., 201054 | Rat model study | Animals | Male Fischer rats (*n*░=░32) with weights ranging from 175 to 200░g. Animals were randomly assigned to four groups (*n*░=░8 rats per group) | Male Fisher rats were fed with 250░mg░kg1░day1 pomegranate extract (PE) or 15░mg░kg1░day1 UROA for 25 days | Male Fisher rats were fed with 250░mg░kg1░day1 pomegranate extract (PE) or 15░mg░kg1░day1 UROA for 25 days. Dextran sodium sulfate (5%) (DSS) was administered for the five last days and then rats were euthanized. DSS is a well-known model of inflammatory bowel disease. Colon tissue damage, microbiota changes, antioxidant status, prostaglandin E2 (PGE2), nitric oxide production, inducible nitric oxide synthase (iNOS), prostaglandin E synthase (PTGES), gene expression (microarrays and RTPCR) and polyphenol metabolism (LC-MS-MS) were evaluated. Both PE and UROA decreased inflammation markers (iNOS, cycloxygenase-2, PTGES and PGE2 in colonic mucosa) and modulated favorably the gut microbiota. The G1 to S cell cycle pathway was up-regulated in both groups. UROA group showed various downregulated pathways, including that of the inflammatory response. PE, but not UROA, decreased oxidative stress in plasma and colon mucosa. Only UROA preserved colonic architecture. The normal formation of urolithins in PE-fed rats was prevented during inflammation. Our results suggest that UROA could be the most active anti-inflammatory compound derived from pomegranate ingestion in healthy subjects, whereas in colon inflammation, the effects could be due to the nonmetabolized ellagitannin-related fraction |
| Lewis et al., 201744 | Review |  |  |  | Findings from epidemiology studies have indicated that diets high in animal fat and low in fruits and vegetables are the most common pattern associated with an increased risk of IBD. Low levels of vitamin D also appear to be a risk factor for IBD. In murine models, diets high in fat, especially saturated animal fats, also increase inflammation, whereas supplementation with omega 3 long-chain fatty acids protect against intestinal inflammation. Unfortunately, omega 3 supplements have not been shown to decrease the risk of relapse in patients with Crohn’s disease. Dietary intervention studies have shown that enteral therapy, with defined formula diets, helps children with Crohn’s disease and reduces inflammation and dysbiosis. Although fiber supplements have not been shown definitively to benefit patients with IBD, soluble fiber is the best way to generate short-chain fatty acids such as butyrate, which has anti-inflammatory effects. Addition of vitamin D and curcumin has been shown to increase the efficacy of IBD therapy |
| Li et al., 201542 | A total of 14 case–control studies were included in this meta-analysis | Humans |  |  | On the basis of the highest versus the lowest analysis, consumption of vegetables was associated inversely with the risk of ulcerative colitis (UC) (OR░=░0.71, 95% CI 0.58–0.88, *n*░=░9 studies), but not with Crohn’s disease (CD) (OR░=░0.66, 95% CI 0.40–1.09, *n*░=░8 studies). Higher consumption of fruit was associated inversely with the risk of UC (OR░=░0.69, 95% CI 0.49–0.96, *n*░=░8 studies) and CD (OR░=░0.57, 95% CI 0.44–0.74, *n*░=░10 studies). For intake of vegetables and the risk of CD, subgroup analysis showed a significant association for studies carried out in Europe (OR░=░0.36, 95% CI 0.23–0.57), but not in Asia (OR░=░1.00, 95% CI 0.50–2.03). No significant publication bias was found for the analysis of intake of vegetables and the risk of UC, intake of fruit and the risk of UC, and intake of vegetables and the risk of CD. This meta-analysis indicates that consumption of vegetables and fruit might be associated inversely with the risk of UC and CD, and the results need to be further confirmed |
| Lucendo and De Rezende, 200946 | Report |  |  |  | Various feeding practices have been implicated in the origin of IBD based on epidemiological observations in developed countries, but we do not have solid evidence for the etiological role played by specific food types. IBD is associated with frequent nutritional deficiencies, the pattern and severity of which depends on the extent, duration and activity of the inflammation. Nutritional support allows these deficiencies in calories, macro- and micro-nutrients to be rectified. Enteral nutrition is also a primary therapy for IBD, especially for Crohn’s disease, as it allows the inflammatory activity to be controlled, kept in remission, and prevents or delays the need for surgery. Nutritional support is especially important in childhood IBD as an alternative to pharmacological treatment |
| Niewiadomski et al., 201647 | A population-based study | Humans | One hundred and thirty-two incident cases (81 Crohn disease (CD) and 51 ulcerative colitis (UC)) from an IBD registry and 104 controls replied to the International Organization of Inflammatory Bowel Diseases environmental questionnaire | This first Australian population-based study of environmental risk factors confirms that smoking, childhood immunological events and dietary factors play a role in IBD development | The factors associated with CD included smoking (odds ratio (OR): 1.42, confidence interval (CI): 1–2.02, *P*░=░0.029); childhood events, including tonsillectomy (OR: 1.74, CI: 1.15–2.6, *P*░=░0.003) and chicken pox infection (OR: 3.89, CI: 1.61–9.4, *P*░=░0.005) and pre-diagnosis intake of frequent fast food (OR: 2.26, CI: 1.76–4.33, *P*░=░0.003). In UC, the risk factors included smoking (OR: 1.39, CI: 1.1–1.92, *P*░=░0.026) and pre-diagnosis intake of frequent fast food (OR: 2.91, CI: 1.54–5.58, *P*░<░0.001), and high caffeine intake was protective (OR: 0.51, 95% CI: 0.3–0.87, *P*░=░0.002). Other protective exposures for UC included high fruit intake (OR: 0.59, CI: 0.4–0.88, *P*░=░0.003) and having pets as a child (OR: 0.36, CI: 0.2–0.79, *P*░=░0.001) |
| Rosillo et al., 201255 | a murine chronic model | Animals | Four-week-old male Wistar rats are randomized into six groups | Rats were fed with different diets during 30 days before TNBS instillation and 2 weeks before killing: (i) standard, (ii) PE 250░mg/kg/day, (iii) PE 500░mg/kg/day, (iv) EA 10░mg/kg/day and (v) EA 10░mg/kg/day enriched-PE 250░mg/kg/day | Inflammation response was assessed by histology and MPO activity and TNF- production. Besides, colonic expressions of iNOS, COX-2, p38, JNK, pERK1/2 MAPKs, IKB and nuclear p65 NF-B were studied by western blotting. MPO activity and the TNF- levels were significantly reduced in dietary fed rats when compared with TNBS group. Similarly, PE and an EA-enriched PE diets drastically decreased COX-2 and iNOS overexpression, reduced MAPKs phosphorylation and prevented the nuclear NF-B translocation. Dietary supplementation of EA contributes in the beneficial effect of PE in this experimental colitis model and may be a novel therapeutic strategy to manage inflammatory bowel disease (IBD) |
| Tomasello et al., 201645 | Review |  |  |  | The purpose of this literature review is to elucidate the influence of diet on the composition of the gastrointestinal microbiota in the healthy gut and the role of diet in the development of dysbiosis. The ``Western diet'', in particular a low-fiber high fat/high carbohydrate diet is one factor that can lead to severe dysbiosis. In contrast, ``mediterranean'' and vegetarian diets that includes abundant fruits, vegetables, olive oil and oily fish are known for their anti-inflammatory effects and could prevent dysbiosis and subsequent inflammatory bowel disease |
| Triggs et al., 201049 | Clinical trial | Humans | Four hundred and forty-six CD subjects from two different centers in New Zealand were recruited into the study | An extensive dietary questionnaire (257 food items in 15 groups) recorded self-reported dietary tolerances and intolerances | A small number of foods are frequently considered to be beneficial, including white fish, salmon and tuna, gluten-free products, oatmeal, bananas, boiled potatoes, sweet potatoes (kumara), pumpkin, soya milk, goat’s milk and yoghurt. Foods that are typically considered detrimental include grapefruit, chilli or chilli sauce, corn and corn products, peanuts, cream, salami, curried foods, cola drinks, high energy drinks, beer, and red wine. For a number of the food items, the same item that was beneficial for one group of subjects was detrimental to others; in particular soya milk, goat’s milk, yoghurt, oatmeal, kiwifruit, prunes, apple, broccoli, cauliflower, linseed, pumpkin seed, sunflower seed, ginger and ginger products, beef, lamb, liver, and oily fish. It was not possible to identify a specific group of food items that should be avoided by all CD patients. The wide range of detrimental items suggests that dietary maintenance of remission is likely to be difficult, and to exclude a substantial number of foods |
| Walton and Alaunyte, 201450 | The cross-sectional study | Humans | A total of ninety-seven UC patients were recruited across the UK from the National Association for Colitis and Crohn’s Disease registers. The inclusion Criteria are: aged 18–65 years and no history of UC-related surgery | A 24░h dietary recall (*n*░=░81) is used to assess nutrient intakes, which were then compared with the national recommended intake values | The results showed that the nutritional knowledge of participants was limited with unofficial sources being used, including websites. Numerous food groups, predominantly fiber-rich foods and fruit and vegetables, were largely avoided by the participants. Almost half of the study population eliminated foods such as dairy products to alleviate symptoms, possibly unnecessarily. Energy intakes were significantly (*P*, 0.05) lower than the national recommended intake values in women aged 18–65 years and men aged 18–60 years. Fat intake exceeded the national recommended intake values (*P*, 0.0001), at the expense of carbohydrate and fiber intakes, which were significantly (*P*, 0.005) lower than the national recommended intake values. Protein intake was significantly high in women aged 19–50 years (*P*, 0.00) and men aged 19–50 years (*P*, 0.005). Vitamin C, vitamin B12 and Ca intake levels were overachieved by all participants (*P*, 0.001), while women aged 19–50 years did not achieve their dietary Fe reference nutrient intake levels (*P*, 0.001). Osteopaenia, osteoporosis and anemia were reported by 12, 6 and 31% of the participants, respectively |
| Yamamoto et al., 200943 | Review article | Humans |  |  | There are many studies in small cohorts of patients that claim that intake of certain diet constituents like fat, refined sugar, fruits, vegetables and fiber affect the expression of IBD. These are often compromised by insufficient data or methodological limitations and do not provide unequivocal evidence to incriminate any particular dietary factor. Among various dietary interventions, none has shown striking efficacy with the possible exception of complete enteral nutrition. Enteral nutrition appears effective in both active and quiescent Crohn’s disease (CD), but independent meta-analyses have shown enteral nutrition to be inferior to corticosteroids in the management of active CD, when assessed on an intention-to-treat basis |
| Zhang et al., 201653 | A mice model study | Animals | C57BL/6 mice were purchased from Shanghai Public Health Clinical Center and kept under pathogen-free conditions | The mice received an oral dose of GB (50░mg/kg) once daily | C57BL/6 mice were given drinking water containing DSS (3%) for eight days to induce acute colitis. At the same time, the mice received an oral dose of GB (50░mg/kg) once daily. The GB-treated mice were less susceptible to the development of acute colitis than were control mice treated with saline, as determined by weight loss, disease activity, and colon histology. The administration of GB to DSS-treated mice also reduced the numbers and inhibited the activation of colon-infiltrating T cells, neutrophils, intestinal CD103CD11c+ dendritic cells (cDCs), and macrophages. In addition, GB treatment promoted the migration of CD103+ CD11c+ cDCs and expansion of Foxp3+ regulatory T cells in the colons of DSS-treated mice. Similarly, in the DSS-induced chronic colitis model, GB treatment improved the macroscopic and histological appearance of the colon wall when compared to untreated control mice, as indicated by longer colon length and lower histological scores |

Table 4 Olive oil intake and IBD.

| Author | Type of study | Vitro animals–humans | Subjects | Olive oil or dietary products used | Results |
| --- | --- | --- | --- | --- | --- |
| Owen et al., 200057 | Quantitative determination and measurement of the phenolic constituents present in olive oil – survey |  |  | Olive oil | Extravirgin olive oil contains an abundance of phenolic antioxidants |
| Reddy and Naidu, 201658 |  | Vitro and vivo | Caco-2 cells and adult Wistar rats | Oleic acid & hydroxytyrosol (OT) enriched medium; Diet enriched with high amount of medium chain triglycerides (MCT), virgin olive oil, or their combination with fish oil | Combined treatment of hydroxytyrosol, oleic acid and n-3 fatty acids exhibit huge therapeutic benefits in colitis |
| Cárdeno et al., 201459 |  | Vitro | Blood and intestinal T cells from IBD patients | Unsaponifiable fraction (UF) of extra virgin olive oil (EVOO) | Promoted apoptosis and attenuated activation of intestinal and blood T cells isolated from IBD patients, decreasing the frequency of CD69(+) and CD25(+) T cells and, also, the secretion of IFN-. Moreover, UF reduced the expression of the gut homing receptor integrin 7 on blood T cells from IBD patients |
| Sanchez-Fidalgo et al., 201063 | Clinical study (randomized) | Mice | Six-week-old C57BL/6 mice | Sunflower oil (SFO) and EVOO diets, both at 10% | Better DAI, a minor number of dysplastic lesions, a lower -catenin immunoreactivity, a non modification of p53 expression and, COX-2 and iNOS reduction in the colonic tissue |
| Sanchez-Fidalgo et al., 201261 | Clinical study (randomized) | Mice | Six-week-old mice | Three dietary groups: standard, EVOO and hydroxytyrosol-enriched EVOO | TNF- was maintained near to sham control and IL-10 levels were significantly improved in EVOO and EVOO plus hydroxytyrosol diet-DSS groups. In the same way, COX-2 and iNOS were downregulated, and the activation of p38 MAPK was reduced. Higher significant reduction in iNOS in hydroxytyrosol-enriched EVOO compared with EVOO alone |
| Sanchez-Fidalgo et al., 201362 | Clinical study | Mice | C57BL/6 mice | sunflower oil (SD), EVOO diet and UF-enriched SD at 5% oil (SD░+░UF) | Both dietary treatments significantly induced decreases in MCP-1 and TNF- levels, iNOS and COX-2 overexpression and p38 MAPKs activation in colon mucosa. Moreover, an upregulation of IB expression was also observed after feeding the animals with both diets. However, no statistically differences between data from mice fed with EVOO or UF░+░SD diets were observed. Dietary enrichment with EVOO's UF reduces the damage in acute colitis model, alleviating the oxidative events and returning proinflammatory proteins expression to basal levels probably through p38 MAPK and NFB signaling pathways |
| Sanchez-Fidalgo et al., 201364 | Clinical study (randomized) | Mice | Six-week-old mice | Four dietary groups: standard diet (SD), EVOO diet and both enriched with PE (850░ppm) (SD░+░PE and EVOO░+░PE) | In DSS-treated and EVOO░+░PE-fed mice, DAI and cell proliferation were significantly reduced, as well as MCP-1, TNF-, COX-2 and iNOS expression levels. In addition, this dietary group, notably down-regulated JNK phosphorylation, prevented IB degradation and PPAR deactivation |
| Sanchez-Fidalgo et al., 201561 | Clinical study (randomized) | Mice | Six-week-old mice | Four dietary groups: sham and control groups received standard diet, and other two groups were fed with HTy-Ac and DHPG, respectively, at 0.1% | Only HTy-Ac-supplemented group showed a significant DAI reduction as well as an improvement of histological damage and MPO. COX-2 and iNOS protein expression were also significantly reduced. In addition, this dietary group down-regulated JNK phosphorylation and prevented the DSS-induced nuclear translocation level of p65. However, no significant differences were observed in the FOXP3 expression |
| DeCoffee et al., 201665 | Clinical study | Mice | C57BL/6 mice infected with *C. rodentium* | Isocaloric, high-fat diets composed of corn oil (rich in n-6 polyunsaturated fatty acids [n-6 PUFAs]), olive oil (rich in monounsaturated fatty acids), or milk fat (rich in saturated fatty acids) with or without fish oil (rich in n-3 PUFAs). After 5 weeks of dietary intervention, mice were challenged with *C. rodentium*, and pathological responses were assessed | Olive oil diets resulted in little colonic pathology associated with intestinal alkaline phosphatase, a mucosal defense factor that detoxifies lipopolysaccharide |
| Hegazi et al., 200666 | Clinical study | Mice | IL-10/ mice | IL-10/ mice were fed chow supplemented with corn oil (CO; control, *n*░=░28), olive oil (OO; *n*░=░29), or fish oil (FO; *n*░=░35) for 12 week and their colons were studied for colitis score, premalignant changes and COX-2 expression | The incidence of severe colitis (score > or = 3) was significantly higher in the FO than in the CO and OO groups (50% versus 7.7% and 3.7%, respectively, *P*░<░0.05). Dysplasia was more frequent in the FO and less frequent in the OO than in the CO group (47% and 4% versus 15%, respectively, *P*░<░0.05). Conversely, aberrant crypt foci and crypt index were significantly higher in the FO than in the CO group. Colitis score, aberrant crypt foci, and crypt index did not differ between the OO and CO groups. COX-2 immunostaining was significantly lower in the OO than in CO group (*P*░<░0.05) but not different between the FO and CO groups |
| Takashima et al., 201467 | Case–control study | Rats | Six-week-old male rats | Control group, standard diet without DSS; DSS group, standard diet░+░DSS; and DSS░+░EVOO group, EVOO diet (weight percentage: 5%)░+░DSS | Enhanced expressions of STAT3, pSTAT3, COX-2 and iNOS by DSS was attenuated by EVOO. In addition, EVOO attenuated increases in cell proliferation (PCNA) caused by DSS and recovered decreases in apoptosis (cleaved caspase-3) |
| Bertevello et al., 201270 | Clinical study (randomized) | Rats | Wistar rats (*n*░=░40) | Groups: 100% soybean oil (SO), 50% MCT mixed with 50% soybean oil (MCT/SO), 80% olive oil mixed with 20% soybean oil (OO/SO), or saline (CC) | OO/SO had higher frequencies of ulcer and necrosis (*P*░<░0.005); OO/SO is associated with increased interleukin (IL)-6 and decreased tumor necrosis factor- expression (*P*░<░0.05) |
| [0,1-6] | | | | | |
| Camuesco et al., 200668 | Clinical study | Rats | Female Wistar rats  Five groups of rats (*n*░=░10) were used | 2 groups received an olive-oil-based diet with fish oil, rich in n-3 PUFA (FO diet) for 2 weeks  1 of those also was administered daily QR (1░mg/kg, PO)  2 groups fed with standard rat diet, one of them being administered QR as before.  A non-colitic group fed standard diet was also included | Thus, both colonic myeloperoxidase (MPO) and alkaline phosphatase (AP) activities were significantly reduced compared with untreated colitic rats. In addition, a complete restoration of colonic glutathione content, was obtained in rats treated with QR plus FO diet; When compared with the control colitic group, the combined treatment was also associated with a lower colonic nitric oxide synthase and cyclooxygenase-2 expression as well as with a significant reduction in different colonic proinflammatory mediators assayed, *i.e.*, leukotriene B(4), tumor necrosis factor alpha and interleukin 1beta |
| [0,1-6] | | | | | |
| Camuesco et al., 200569 | Clinical study | Rats | Female Wistar rats (180–200░g) | The rats were randomly assigned to 4 groups (*n*░=░10); 2 groups (noncolitic and control colitic groups) were fed the SO diet, 1 was fed the OO diet, and the remaining group was fed the FO diet | A restoration of colonic glutathione levels and lower colonic NO synthase expression occurred in all colitic rats fed an olive oil diet compared with the control colitic group that consumed the soybean oil diet. However, (n-3) PUFA incorporation into an olive oil diet significantly decreased colonic TNF and LTB4 levels compared with colitic rats that were not supplemented with fish oil |
| D’Souza et al., 200871 | Case–control study | Humans | 149 cases and 251 controls; mean age (range) of the cases was 13.3 (2.6–20 years). There were more boys (61.1%) | Pre-disease diet was assessed using a validated food frequency questionnaire (FFQ) | Diet with vegetables, fruits, olive oil, fish, grains, and nuts were inversely associated with CD in both genders (girls: OR 0.3, 95% CI 0.1–0.9; boys: OR 0.2, 95% CI 0.1–0.5) |
| Octoratou et al., 201272 | Food survey | Humans | Twenty eight patients with a newly established diagnosis of CD (2–4 weeks), (12 men and 16 women), 30 patients with previously (between 2 and 11 years) established diagnosis of CD (14 men and 16 women) and 38 age- and sex-matched healthy controls (16 men and 22 women) | Consumption of olive oil | An increase consumption of olive oil (*P*░=░0.038) was obtained in group with CD |
| Farzaei et al., 201573 | Review |  |  |  | Dietary polyphenols possess both protective and therapeutic effects in the management of IBD mediated via down-regulation of inflammatory cytokines and enzymes, enhancing antioxidant defense, and suppressing inflammatory pathways and their cellular signaling mechanisms |

Table 5 Yogurt and fermented milk intake and IBD.

| Author | Type of study | Vitro animals–humans | Subjects | Probiotic or dietary products used | Results |
| --- | --- | --- | --- | --- | --- |
| Stecher, 201474 | Article |  |  |  | The development of new therapies for the treatment of human IBD and infectious diseases can be promoted reverting a dysbiotic microbiota to a normal state and it could be done thanks to probiotics |
| Butel, 201475 | Review |  |  |  | The new methods used to analyze the microbiota and its functions should greatly help to work on a large number of samples and have a very global approach of the microbiota, including its functions. Furthermore, it is important to work on choosing the right probiotic strain for a given application, the effect being strain dependent. Microbiota modulation protocols, either by using genetically modified probiotic strains or complex microbiota, such as the successful attempts of fecal transplantation to manage recurrent *C. difficile* diarrhea, are also interesting alternatives |
| Veiga et al., 201078 | Clinical study | Murine model | T-bet/ Rag2/ mice | *Bifidobacterium animalis* subsp. lactis fermented milk | Metabolic changes: Colitis scores were decreased in the BFMP group (1.67░±░1.53) compared with MP (4.11░±░1.53; *P*░<░0.0001) and sham (5.43░±░0.98) |
| Imaoka et al., 200877 | Clinical study | Vitro with humans cells | Peripheral blood mononuclear cells (PBMNC) were isolated from peripheral blood of UC patients | *B. breve* or *B. bifidum* – Fermented milk | Probiotic *Bifidobacterium* strains in BFM enhance IL-10 production in PBMNC and inhibit IL-8 secretion in intestinal epithelial cells |
| Sheikhi et al., 201676 | Clinical study | Vitro with humans cells | 36 inactive UC patients, using their peripheral blood mononuclear cells (PBMC) 21 male – 15 female (32.5░±░10.4 years) | *Bifidobacterium lactis* BB-12 (*B. lactis*) and *Lactobacillus acidophilus* LA-5 (*L. acidophilus*) | Both bacteria significantly augmented IL-10, TGF-, IFN- and TNF- compared to control. The secretion levels of IL-10 and TGF- by *B. lactis* – compared to *L. acidophilus*-stimulated PBMCs were significantly higher. The secretion levels of TNF- and IFN- by PBMCs after 72░h were significantly lower compared to 48░h stimulation by *B. lactis* |
| Chaves et al., 201179 | Clinical study | Mice | 5 week-old female BALB/c mice | Yogurt with Lactobacillus d. subs. vulgaricus and *Streptococcus termophilus* | Decrease of TLR4(+) and increase of TLR9(+) cells |
| Gobbato et al., 200880 | Clinical study | Mice | Six- to eight-week-old random-bred BALB/c mice | Yogurt with *L. delbrueckii* subsp. bulgaricus and *S. thermophilus* | Increased in IgA+ cells, capable of modulating the inflammatory response with a diminution in CD4+ and CD8+ population and an increase in the apoptosis of the infiltrative immune cells |
| Saraiva et al., 201581 | Clinical study | Mice | Female BALB/c mice | Fermented milk with *L. lactis* | Anti-inflammatory effects with production of 15-lipoxygenase-1 (15-LOX-1) |
| Del Carmen et al., 201182 | Trial | Murine model | Five-week old female BALB/c mice | Fermented milk with *L. lactis* | Mice that received milks fermented by *L. lactis* strains producing IL-10 in the cytoplasm (Cyt strain) or secreted to the product (Sec strain) showed lower damage scores in their large intestines, decreased IFN- levels in their intestinal fluids and lower microbial translocation to liver |
| Laake et al., 200584 | Clinical trial | Humans | 51 UC patients and 10 patients with FAP, operated on with IPAA, and six UC patients operated on for IRA | Five hundred milliliters of a fermented milk product (Cultura) containing live *lactobacilli* (La-5) and *bifidobacteriae* (Bb-12) was given daily for 4 weeks | Involuntary defecation, leakage, abdominal cramps and the need for napkins (category I), fecal number and consistency (category II) and mucus and urge to evacuate stools (category III) were significantly decreased during intervention in the UC/IPAA group. In the FAP group there was a significant decrease in fecal leakage, abdominal cramps and use of napkins (category I) during intervention. The median endoscopic score of inflammation was significantly decreased during intervention in the UC/IPAA patients. Blood tests, fecal fungi and fecal pH did not change significantly during intervention |
| Ishikawa et al., 201185 | Randomized controlled study | Humans | 41 patients with UC | *B. breve* strain in fermented-milk | The clinical status of the UC patients as assessed by colonoscopy, significantly improve |
| Ishikawa et al., 200386 | Randomized clinical trial | Humans | 21 participants | Bifidobacteria-fermented milk (100░ml/day for 1 year) | Exacerbation of symptoms was seen in 3 out of 11 subjects in the BFM group and in 9 out of 10 in the control group |
| Kato et al., 200487 | Randomized placebo-controlled trial | Humans | Twenty patients with mild to moderate, active, ulcerative colitis | Bifidobacteria-fermented milk supplementation | Increases in fecal butyrate, propionate and short-chain fatty acid concentrations were significant in the bifidobacteria-fermented milk, but not the placebo group |
| Baroja et al., 200783 | Clinical trials | Humans | 20 subjects with IBD and 20 healthy controls with no known or suspected intestinal abnormalities; The mean age standard deviation (s.d.) of IBD patients was 44░±░11.7 (range 26–63) years and that of controls 51░±░6.4 (38–61) years. Of the IBD patients, 15 had Crohn’s disease, 5 had ulcerative colitis | All subjects consumed 125░g of probiotic yogurt per day for 30 days – *L. rhamnosus* GR-1 and *L. reuteri* RC-14 | The proportion of CD4+ CD25high T cells increased significantly (*P*░=░0.007) in IBD patients, mean (95% confidence interval: CI) 0.84% (95% CI 0.55–1.12) before and 1.25% (95% CI 0.97–1.54) after treatment, but non-significantly in controls. The basal proportion of tumor necrosis factor (TNF)-a+/interleukin (IL)-12+ monocytes and myeloid DC decreased in both subject groups, but of stimulated cells only in IBD patients. Also serum IL-12 concentrations and proportions of IL-2+ and CD69+ T cells from stimulated cells decreased in IBD patients |
| Octoratou et al., 201272 | Food survey | Humans | Twenty eight patients with a newly established diagnosis of CD (2–4 weeks), (12 men and 16 women), 30 patients with previously (between 2 and 11 years) established diagnosis of CD (14 men and 16 women) and 38 age- and sex-matched healthy controls (16 men and 22 women) | Food questionnaire – milk and yogurt | Comparisons between controls and newly diagnosed patients showed that increased consumption of milk and yogurt (*P*░=░0.042), was associated with decreased risk for CD |
| Opstelten et al., 2016115 | EPIC-IBD Study (cohort study) Food survey | Humans | 401,326 participants healthy men and women (aged 20–80 years) Cases developing incident CD (*n*░=░110) or UC (*n*░=░244) during follow up were matched with 4 controls | Milk, yogurt and cheese | Individual consuming milk had reduced odds of CD (OR 0.30, 95% CI, 0.13–0.65) and non-significative reduced odds of UC (OR 0.85, 95% CI, 0.49–1.47) |

Table 6 Fish intake and IBD.

| Author | Type of study | Vitro animals–humans | Subjects | Dietary products used | Results |
| --- | --- | --- | --- | --- | --- |
| De Coffee et al., 201665 | Clinical study | Vivo mice | C57BL/6 female mice | Isocaloric, high-fat diets composed of corn oil (rich in n-6 polyunsaturated fatty acids [n-6 PUFAs]), olive oil (rich in monounsaturated fatty acids), or milk fat (rich in saturated fatty acids) with or without fish oil (rich in n-3 PUFAs) | A diet rich in a combination of MUFAs, SFAs, and n-3 PUFAs, with limited n-6 PUFAs, is recommended to maintain defensive inflammatory and mucosal responses to enteric infection while mitigating the damaging effects of inflammation |
| Ananthakrishnan et al., 201488 | Prospective study | Humans | Among 170,805 women, 269 incident cases of CD (incidence 8/100,000 person-years) and 338 incident cases of UC (incidence 10/100,000 person-years) over 26 years and 3,317,338 person-years of follow-up | Questionnaire | A high intake of dietary long-chain n-3 PUFA may be associated with a reduced risk of UC. In contrast, high intake of trans-unsaturated fats may be associated with an increased risk of UC |
| Ferreira et al., 201092 | Clinical Study | Humans | 99 patients with CD and 116 healthy controls |  | None of the polymorphisms analyzed influenced disease susceptibility and/or activity, but a high intake of total, saturated and monounsaturated fats and a higher ratio of n-6/n-3 polyunsaturated fatty acids (PUFA), was associated with a more active phenotype (*P*░<░0.05). The detrimental effect of a high intake of total and trans fat was more marked in wild type carriers of the Caspase9 93C/T polymorphism [OR (95%CI) 4.64 (1.27–16.89) and OR (95%CI) 4.84 (1.34–17.50)]. In the Peroxisome Proliferator-Activated Receptor gamma Pro12Ala SNP, high intake of saturated and monounsaturated fat was associated to a more active disease in wild type carriers [OR (95%CI) 4.21 (1.33–13.26) and 4.37 (1.52–12.51)]. Finally, a high intake of n-6 PUFA was associated with a more active disease in wild type carriers for the FasLigand-843C/T polymorphism [OR (95%CI) 5.15 (1.07–24.74)] |
| Rashvand et al., 201589 | Case–control study | Humans | 62 new cases of UC and 124 healthy age and sex-matched controls were studied | Questionnaire | Positive associations between dietary intake of total fat (*P* value for trend < 0.01), oleic acid (*P* value for trend < 0.01), saturated fatty acid (SAFA) (*P* value for trend░=░0.02), total polyunsaturated fatty acid (PUFA) (*P* value for trend░=░0.04), and trans fat (*P* value for trend < 0.01) |
| Okada et al., 201390 | Clinical study | Mice and vitro cells | C57 BL/6 mice and lipopolysaccharide (LPS)-stimulated RAW264.7 cells and peritoneal macrophages | Mice fed diet containing 1.3% TFAs (mainly C16:1, C18:1, C18:2, C20:1, C20:2 and C22:1) | TFAs exacerbate colonic inflammation by promoting Th17 polarization and by up-regulating the expression of proinflammatory cytokines in the inflamed colonic mucosa |
| Huang et al., 201791 | Clinical study | Mice | Male C57BL/6 mice at 6 weeks old | Diets with soybean oil (S), a mixture of soybean oil and low fish oil content (LF), or high fish oil content (HF) | Colitic groups with fish oil had lower inflammatory mediators in the plasma and colon lavage fluid. Furthermore, the percentages of blood Th1, Th2, and Th17 cells were lower, whereas Treg cell percentages were higher than those in the soybean oil group. The colitis group with an -6/-3 PUFA ratio of 2:1 had more pronounced effects than the group with a ratio of 4:1 |
| Eaton et al., 201593 | Multicenter, case–control analysis | Humans | 1000 cases and 663 controls IBD was reported among nine controls (UC *n*░=░4; Crohn’s disease *n*░=░4; indeterminate colitis *n*░=░1) and 741 cases (UC *n*░=░538; Crohn’s disease *n*░=░110; indeterminate colitis *n*░=░93) | Questionnaires | PSC patients regardless of gender or IBD status were less likely to eat fish (OR, 0.4; 95% CI 0.3–0.6) and grilled/barbecued meat (OR, 0.8; 95% CI 0.7–0.9). In contrast, PSC patients with and without IBD were more likely to consume steak/burgers that were more well done (OR, 1.3; 95% CI 1.2–1.5) |

Table 7 Legumes intake and IBD.

| Author | Type of study | Vitro animals–humans | Subjects | Dietary products used | Results |
| --- | --- | --- | --- | --- | --- |
| Monk et al., 201697 | A mice model study | Animals |  | We assessed the gut health priming effect of a 20% cranberry bean flour diet from two bean varieties with differing profiles of phenolic compounds [darkening (DC) and nondarkening (NDC) cranberry beans vs. basal diet control (BD)] on critical aspects of gut health in unchallenged mice, and during dextran sodium sulfate (DSS)-induced colitis (2% DSSwt/vol, 7 days) | In unchallenged mice, NDC and DC increased (i) cecal short-chain fatty acids, (ii) colon crypt height, (iii) crypt goblet cell number and mucus content and (iv) Muc1, Klf4, Relm and Reg3 gene expression vs. BD, indicative of enhanced microbial activity and gut barrier function. Fecal 16S rRNA sequencing determined that beans reduced abundance of the Lactobacillaceae (*Ruminococcus gnavus*), Clostridiaceae (*Clostridium perfringens*), Peptococcaceae, Peptostreptococcaceae, Rikenellaceae and Pophyromonadaceae families, and increased abundance of S24-7 and Prevotellaceae. During colitis, beans reduced (i) disease severity and colonic histological damage, (ii) increased gene expression of barrier function promoting genes (Muc1-3, Relm, and Reg3) and (iii) reduced colonic and circulating inflammatory cytokines (IL-1, IL-6, IFN and TNF). Therefore, prior to disease induction, bean supplementation enhanced multiple concurrent gut health promoting parameters that translated into reduced colitis severity. Moreover, both bean diets exerted similar effects, indicating that differing phenolic content did not influence the endpoints assessed. These data demonstrate a proof-of-concept regarding the gut-priming potential of beans in colitis, which could be extended to mitigate the severity of other gut barrier-associated pathologies |
| Ojwang et al., 201596 | *In vitro* study |  |  |  | Real-time qRT-PCR analysis in LPS-stimulated cells revealed down-regulation of proinflammatory cytokines (IL-8, TNF-, VCAM-1), transcription factor NF-B and modulation of microRNA-126 (specific post-transcriptional regulator of VCAM-1) by cowpea polyphenolics. The ability of cowpea polyphenols to modulate miR-126 signaling and its target gene VCAM-1 were studied in LPS stimulated endothelial cells transfected with a specific inhibitor of miR-126, and treated with 10░mg GAE/L black cowpea extract where the extract in part reversed the effect of the miR-126 inhibitor. This suggests that cowpea may exert their anti-inflammatory activities at least in part through induction of miR-126 that then down-regulate VCAM-1 mRNA and protein expressions. Overall, Cowpea therefore is promising as an anti-inflammatory dietary component |
| Triggs et al., 201049 | Clinical trial | Humans | Four hundred and forty-six CD subjects from two different centers in New Zealand were recruited into the study | An extensive dietary questionnaire (257 food items in 15 groups) recorded self-reported dietary tolerances and intolerances | A small number of foods are frequently considered to be beneficial, including white fish, salmon and tuna, gluten-free products, oatmeal, bananas, boiled potatoes, sweet potatoes (kumara), pumpkin, soya milk, goat’s milk and yoghurt. Foods that are typically considered detrimental include grapefruit, chilli or chilli sauce, corn and corn products, peanuts, cream, salami, curried foods, cola drinks, high energy drinks, beer, and red wine. For a number of the food items, the same item that was beneficial for one group of subjects was detrimental to others; in particular soya milk, goat’s milk, yoghurt, oatmeal, kiwifruit, prunes, apple, broccoli, cauliflower, linseed, pumpkin seed, sunflower seed, ginger and ginger products, beef, lamb, liver, and oily fish. It was not possible to identify a specific group of food items that should be avoided by all CD patients. The wide range of detrimental items suggests that dietary maintenance of remission is likely to be difficult, and to exclude a substantial number of foods |
| Utrilla et al., 201594 | Mice model study | Animals | Male C57BL/6J mice (7–9 wk old) obtained from Janvier (St Berthevin Cedex, France) are randomly assigned to five different groups (*n*░=░10): one noncolitic control, and four DSS colitic groups | Treated groups received orally PSE (15░g/kg day), or AF-PSE (1.5░g/kg day), or pure soy Bowman–Birk inhibitor (BBI; 50░mg/kg day), starting 2 wk before colitis induction, and maintained for 9 days after | All treated groups showed intestinal anti-inflammatory effect, evidenced by reduced microscopic histological damage in comparison with untreated colitic mice. The treatments ameliorated the colonic mRNA expression of different proinflammatory markers: cytokines, inducible enzymes, metalloproteinases, adhesion molecules, and toll-like receptors, as well as proteins involved in maintaining the epithelial barrier function. Furthermore, the administration of PSE, AF-PSE, or soy BBI restored bacterial counts, partially or totally, to values in healthy mice |
| Zhang et al., 201495 | Mouse model study | Animals |  | Cooked whole-bean flours | The objective of the present study was to assess the *in vivo* effect of cooked whole-bean flours, with differing phenolic compound levels and profiles, in a mouse model of acute colitis. C57BL/6 mice were fed a 20%navy bean or black bean flour-containing diet or an isoenergetic basal diet (BD) for 2 weeks before the induction of experimental colitis via 7 d dextran sodium sulfate (DSS, 2% (w/v) in the drinking-water) exposure. Compared with the BD, both bean diets increased caecal SCFA and fecal phenolic compound concentrations (*P*, 0.05), which coincided with both beneficial and adverse effects on colonic and systemic inflammation. On the one hand, bean diets reduced mRNA expression of colonic inflammatory cytokines (IL-6, IL-9, IFN-g and IL-17A) and increased anti-inflammatory IL-10 (*P*, 0.05), while systemically reduced circulating cytokines (IL-1b, TNFa, IFNg, and IL-17A, *P*, 0.05) and DSS-induced oxidative stress. On the other hand, bean diets enhanced DSS-induced colonic damage as indicated by an increased histological injury score and apoptosis (cleaved caspase-3 and FasL mRNA expression) (*P*, 0.05). In conclusion, bean-containing diets exerted both beneficial and adverse effects during experimental colitis by reducing inflammatory biomarkers both locally and systemically while aggravating colonic mucosal damage |

Table 8 Eggs intake and IBD.

| Author | Type of study | Vitro animals–humans | Subjects | Dietary products used | Results |
| --- | --- | --- | --- | --- | --- |
| Andersen, 201598 | Review |  |  |  | Bioactive egg components possess pro and/or anti-inflammatory properties and some of these could have implications in colitis |
| Stremmel et al., 2005100 | Double blind, randomized, placebo controlled study | Human | 60 patients were recruited into the study – with chronic active, non steroid dependent, ulcerative colitis, with a clinical activity index (CAI) of > 4 | Retarded release phosphatidylcholine rich phospholipids and placebo were administered at a dose of 6░g daily over three months – not egg | The rate of clinical remission and CAI improvement was 90% in the phosphatidylcholine group and only 10% in the placebo group |
| Shi et al., 201499 | Clinical study | Vitro and vivo mice | The Caco-2 human intestinal cell line and Female Balb/c mice (18–20░g) | ESM hydrolysate (AL-PS) | *In vitro*, AL-PS was shown to inhibit pro-inflammatory cytokine IL-8 secretion. *In vivo* treatment with AL-PS was shown to reduce dextran sodium sulfate (DSS)-induced weight loss, clinical signs of colitis and secretion of interleukin (IL)-6 (*P*░<░0.05). In addition, treatment with AL-PS also attenuated the severity of intestinal inflammation via down-regulation of IL-10 an anti-inflammatory cytokine |
| Kobayashi et al., 2015103 | Clinical study | Vivo – Mice | Female BALB/c mice | Ovotransferrin 50 or 250░mg/kg BW | Reduced clinical signs, weight loss, shortening of the colon, and inflammatory cytokine markers of disease |
| Mañé et al., 2011104 | Clinical study | Vivo-mice | Balb/c mice | AF from freeze-dried egg yolk Mice received AF in sterile drinking-water (4░g/l, *n* 38) and sterile drinking-water alone (vehicle, *n* 38) from TNBS or saline administration onwards | AF-treated mice showed a milder colonic damage; decreased IL-2, IL-1 and leukotriene B4 production at weeks 2 and 3, as well as increased interferon- at week 1; increased counts of apoptotic cells in the lamina propria at weeks 1 and 2 post-TNBS |
| Jantchou et al., 2010106 | Prospective study | Humans | 98,995 women | Questionnaire | Among sources of animal protein, high consumption of meat or fish but not of eggs or dairy products was associated with IBD risk |
| Ehehalt et al., 2004101 | Clinical analysis | Humans | Concentration and composition of phosphatidylcholine in the rectal mucus of patients with ulcerative colitis |  | Phosphatidylcholine explains an increased susceptibility to luminal contents |
| Stremmel et al., 2007102 | Randomized, double-blind, placebo-controlled trial | Humans | 60 patients with chronic-steroid refractory ulcerative colitis and high clinical and endoscopic disease activity indexes | Phosphatidylcholine or cellulose placebo | Phosphatidylcholine reduced corticosteroid dependence |

Table 9 Meat intake and IBD.

| Author | Type of study | Vitro animals–humans | Subjects | Dietary products used | Results |
| --- | --- | --- | --- | --- | --- |
| Le Leu et al., 2013108 | Clinical study | Mice | 32 Balb/c mice induced colitis – 12 days – The fourth group ``RM░+░RS'' consumed cooked red meat at a level of 30/100░g diet and high amylose maize starch at a level of 10/100░g diet | Meat and RS | A dietary intake of red meat aggravates DSS-induced colitis whereas co-consumption of resistant starch reduces the severity of colitis |
| Vidarsdottir et al., 2016109 | Cross-sectional study | Humans | 78 patients (35 men and 43 women aged 18–74 years) with the diagnosis of either Crohn’s disease or ulcerative colitis | Participants filled out disease related questionnaires and 31 participants also a 3-day food record | Restriction of dairy and meat consumption is common and is negatively associated with intake or status of micronutrients like calcium and iron |
| Ge et al., 2015107 | Meta-analysis |  | 9 studies: two cohort and seven case–control studies. Total of 2019 cases of UC, 683 cases of CD and 160 of IBD | Meat consumption (including red meat, processed meat, white meat, poultry, beef, pork, lamb, and goat) | Meat consumption may increase the risk of inflammatory bowel disease: pooled relative ratio 1:50, 95% CI: 1.15–1.95 |
| Eaton et al., 201593 | Multicenter, case–control analysis | Humans | 1000 cases and 663 controls IBD was reported among nine controls (UC *n*░=░4; Crohn’s disease *n*░=░4; indeterminate colitis *n*░=░1) and 741 cases (UC *n*░=░538; Crohn’s disease *n*░=░110; indeterminate colitis *n*░=░93) | Questionnaires | PSC patients regardless of gender or IBD status were less likely to eat fish (OR, 0.4; 95% CI 0.3–0.6) and grilled/barbecued meat (OR, 0.8; 95% CI 0.7–0.9). In contrast, PSC patients with and without IBD were more likely to consume steak/burgers that were more well done (OR, 1.3; 95% CI 1.2–1.5) |
| Barnes et al., 2017113 | A prospective, multicenter, observational study | Humans | 412 patients with UC in remission during monotherapy with an aminosalicylate | Food frequency | Foods previously implicated in flares of UC, such as processed meat, and others were not associated with an increased risk of flare |
| Tasson et al., 2017111 | Cross-sectional study | Humans | 103 adult patients (50 with active disease and 53 in remission, divided by their calprotectin level) | Food frequency | A positive association emerged between meat intake and disease relapse, the highest quartile for meat consumption coinciding with a higher risk of active disease (OR 3.61, 95% CI 1.15–11.38), though this was not significant in the adjusted analysis |
| Hou et al., 201127 | Systematic review |  | Nineteen studies were included, encompassing 2609 IBD patients (1269 Crohn's disease (CD) and 1340 ulcerative colitis (UC) patients) and over 4000 controls |  | Studies reported a positive association between high intake of saturated fats, monounsaturated fatty acids, total polyunsaturated fatty acids (PUFAs), total omega-3 fatty acids, omega-6 fatty acids, mono- and disaccharides, and meat and increased subsequent CD risk |
| Jantchou et al., 2010106 | Prospective study | Humans | 67,581 participants (705,445 person-years, mean follow-up since completion of the baseline dietary questionnaire 10.4 years), were validated 77 incident IBD cases | Questionnaire | High total protein intake, specifically animal protein, was associated with a significantly increased risk of IBD, (hazards ratio for the third vs. first tertile and 95% confidence interval being 3.31 and 1.41–7.77 (*P* trend░=░0.007), and 3.03 and 1.45–6.34 (*P* trend░=░0.005) for total and animal protein, respectively) |
| Jowett et al., 2004112 | Prospective cohort study | Humans | 191 patients were recruited and 96% completed the study – 52% of patients relapsed | Food frequency questionnaire | Consumption of meat (odds ratio (OR) 3.2 (95% confidence intervals (CI) 1.3–7.8)), particularly red and processed meat (OR 5.19 (95% CI 2.1–12.9)), protein (OR 3.00 (95% CI 1.25–7.19)), and alcohol (OR 2.71 (95% CI 1.1–6.67)) in the top tertile of intake increased the likelihood of relapse compared with the bottom tertile of intake |
| Andersen et al., 2012110 | Review |  |  |  | A diet high in protein, particular animal protein, may be associated with increased risk of inflammatory bowel disease and relapses |
| Maconi et al., 2010114 | Case control study | Humans | 83 new cases of IBD (41 ulcerative colitis, 42 Crohn’s disease) and 160 healthy controls were studied | Portions per week of 34 foods and beverages before onset of symptoms were recorded using a validated questionnaire | In IBD patients who did not change dietary habits, moderate and high consumption of margarine (OR░=░11.8 and OR░=░21.37) was associated with ulcerative colitis, whilst high consumption of red meat (OR░=░7.8) and high intake of cheese were associated with Crohn’s disease |

Table 10 Dairy products intake and IBD.

| Author | Type of study | Vitro animals–humans | Subjects | Dietary products used | Results |
| --- | --- | --- | --- | --- | --- |
| Brasil Lopes et al., 2014119 | Cross-sectional study | Humans | 65 outpatients with IBD age 20–75 years and 67.0% were diagnosed with ulcerative colitis | Quantitative food frequency questionnaire | The majority (64.7%) reported restricting dairy products. The frequency of gastrointestinal symptoms was higher among the Crohn’s disease patients who restricted dairy products than among those with no restrictions; this result was not observed among the UC (ulcerative colitis) patients. Disease activity was also more frequent in the IBD patients who restricted dairy products than in those with no restrictions and among the UC patients, extensive disease was more common in the patients who restricted dairy products than in those with no restrictions |
| Judaki et al.,2014123 | Case–control study | Humans | 72 patients with ulcerative colitis, after recording history of the disease, colonoscopy and confirmed by biopsy and 72 person without history of colitis |  | Dairy allergy (including: cow milk, cow milk UHT and casein) in UC group was significant (*P*░=░0.00) |
| Zhao et al., 2012116 | Clinical study | Humans | 26 patients with UC who underwent colonoscopy for disease surveillance and 26 healthy controls | Examined MFG-E8 expression in colonic mucosal biopsies | Decreased colonic MFG-E8 expression in patients with ulcerative colitis may be associated with mucosal inflammatory activity and clinical disease activity through basal cell apoptosis and preventing tissue healing in the pathogenesis of ulcerative colitis |
| Vagianos et al., 2016120 | Cohort study | Humans | 319 patients with IBD. Diets of those with IBD (*n*░=░256) were compared with a matched, non-IBD Canadian cohort using the nutrition questions obtained from the Canadian Health Measures Survey (CHMS) |  | Compared with the non-IBD Canadian population, patients with IBD consume significantly less iron-rich food but more milk |
| Machado et al., 2015121 | Clinical study | Humans | 68 CD patients were randomized in two groups: whey protein group (WP) and soy protein group (SP) – treated with azathioprine or anti-tumor necrosis factor-alpha (anti-TNF-alpha) or azathioprine and anti-TNF-alpha | WP and SP were provided as identical sachets with 15░g and 12░g of supplement, respectively | Body fat percentage and triceps skin fold thickness (TSF) decreased, whereas body lean percentage mid-arm (MAMC) muscle circumference (MAMC) and corrected arm muscle area (CAMA) increased |
| Opstelten et al., 2016115 | Prospective cohort study | Humans | Participants were from a subcohort (EPIC-IBD study), namely 401,326 initially healthy men and women (aged 20–80 yr) |  | Individuals consuming milk have significantly reduced odds of developing CD as compared with nonconsumers |
| Da Silva et al., 2015117 | Review |  |  |  | Numerous studies assessed the effects of individual or mixtures of FAs on inflammatory markers; yet, there is far less research on the effects of other dairy bioactive nutrients |
| Devkota et al., 2012118 | Clinical study | Mice | SPF C57BL/6 mice | Different diets – LF, PUFA, or MF for 1 week (*n*░=░5/group) | Because of their hydrophobicity, milk fats will promote increased hepatic taurine conjugation of bile acids which are more efficient for micelle formation and fat emulsification |
| Eadala et al., 2011126 | Clinical study | Humans | 165 patients (Crohn's disease░=░70, ulcerative colitis░=░95), and 30 healthy volunteers |  | The high breath methane raised the possibility of a pathogenic role for methanogenic archaebacteria (Archaea) in IBD. This needs to be investigated |
| Hanifian, 2014129 | Clinical study | Vitro |  |  | The addition of starter culture could restrict the persistence of *Map*, while *Map* survival was not affected by higher salt concentration |
| Szilagyi et al., 2016127 | Systematic review and meta-analysis |  |  |  | Lactose maldigestion in inflammatory bowel disease is dependent on ethnic makeup of the population and usually not disease. Dairy foods may decrease risks of inflammatory bowel disease. Dairy restrictions may adversely affect disease outcome |
| Eftekhari and Mosavari, 2016130 | Clinical study |  |  |  | Culture and PCR methods are reliable for identification of MAP from milk samples |
| Nolan-Clark et al., 2011128 | Dietary survey | Humans | 165 man and womens (mean age░=░48.8░±░16.3 years) |  | Research outcomes question the necessity of dairy product avoidance in CD patients and illustrate the highly individual nature of dairy product tolerance in this clinical population |
| Wang et al., 2011125 | A case–control study | Humans | 136 determined IBD patients and 136 paired healthy controls | Questionnaire | higher statistical significance in milk, fried food and stress compared with the other postulated risk factors for IBD |
| Virta et al., 2016122 | Cohort study | Humans | 225,041 children |  | Children with cow’s milk allergy were more likely to develop inflammatory bowel disease than non-CMA children – the risk was more evident for UC than crohn’s disease |
| Strisciuglio et al., 2013124 | Prospective, single-center, randomized, controlled clinical trial | Humans | 29 children with UC | Receive a CMP elimination diet (*n*░=░14) or continue a free diet (*n*░=░15) associated with concomitant steroid induction and mesalazine maintenance treatment The PUCAI and physician global assessment (PGA) were used to measure disease activity | Cow’s milk protein elimination diet has no role in the management of UC in non-sensitized children |

Table 11 Nuts and dried fruit and IBD.

| Author | Type of study | Vitro animals–humans | Subjects | Dietary products used | Results |
| --- | --- | --- | --- | --- | --- |
| Gholami et al., 2016131 | Clinical study | Vivo – Rats | Rats | *Pistacia atlantica* (*P. atlantica*), butyrate, *Lactobacillus casei* (*L. casei*) | Reduction of MPO activity (55%, *P*░=░0.0009) |
| Tanideh et al., 2014132 | Clinical study | Vivo – Rats | Seventy male Sprague–Dawley rats (weighing 220░±░20░g) were used | The rats were randomly divided into 7 groups, each containing 10 induced colitis with 2░ml acetic acid (3%). Group 1 (Asacol), group 2 (base gel) and group 7 (without treatment) were assigned as control groups. Group 3 (300░mg/ml) and group 4 (600░mg/ml) received *P. atlantica* fruit orally. Group 5 (10% gel) and group 6 (20% gel) received *P. atlantica* in the form of gel as enema – *P. atlantica* fruit oil extract | Regarding microscopic findings in the treatment groups compared with group 7, the latter group differed significantly with groups 1, 2, 4 and 6 (*P*░<░0.001). There was a significant statistical difference in MDA scores of the seven treatment groups (*F*(5,54)░=░76.61, *P*░<░0.001). Post hoc comparisons indicated that the mean░±░SD score of Asacol treated group (1.57░±░0.045) was not significantly different from groups 4 (1.62░±░0.024) and 6 (1.58░±░0.028) |
| Gautam et al., 2013133 | Clinical study | Vivo – Rats | Rats | Extract of dried fruit pulp of *T. chebula* (TCE) – TCE (600░mg/kg) | Intra-colonic AA administration increased colonic mucosal damage and inflammation, mucus/bloody diarrhea, stool frequency, but decreased body weight which were reversed by TCE and sulfasalazine (SS, positive control) treatments. TCE showed antibacterial activity and both TCE and SS enhanced the antioxidants, but decreased free radicals and myeloperoxidase activities affected in acetic acid-induced colitis. TCE indicated the presence of active principles with proven antioxidants, anti-inflammatory, immunomodulatory, and free radical scavenging and healing properties |
| Mandalari et al., 2011134 | Clinical study | Vivo – mice | Mice | Natural almond skin (NS) powder – was administered daily orally (30░mg/kg) | NS powder significantly reduced the appearance of diarrhea and body weight loss. This was associated with a significant reduction in colonic MPO activity. NS powder also reduced NF-B and p-JNK activation, the pro-inflammatory cytokines release, the appearance of i-NOS, nitrotyrosine and PARP in the colon and reduced the up-regulation of ICAM-1 and the expression of P-selectin |
| Vagianos et al., 2016120 | Cohort study | Humans | 319 patients |  | Food avoidance among IBD is prevalent for nuts and other foods, with a higher prevalence among those with active IBD |
| Cohen et al., 201348 | Dietary survey | Humans | CD without an ostomy or pouch (CD), UC without an ostomy or pouch (UC), CD with an ostomy (CD-ostomy), and UC with a pouch (UC-pouch) | Questionnaire | Non-leafy vegetables, spicy foods, fruit, nuts, leafy vegetables, fried foods, milk, red meat, soda, popcorn, dairy, alcohol, high-fiber foods, corn, fatty foods, seeds, coffee, and beans were more frequently reported to worsen symptoms |
| Triggs et al., 201049 | Dietary survey | Humans | Four hundred and forty-six subjects | Questionnaire | Peanuts show extreme detrimental effects (around 45% of subjects reporting symptom enhancement) with almost no evidence of benefit. All other nuts are reported as enhancing symptoms by between 30 and 35% of subjects, but some are much more likely to be beneficial than others. Thus, hazelnuts are claimed to reduce symptoms in very few subjects, while almonds are reported as beneficial by close to 5% |
| Octoratou et al., 201272 | Prospective study | Humans | Twenty eight patients with a newly established diagnosis of CD (2–4 weeks), (12 men and 16 women), 30 patients with previously (between 2 and 11 years) established diagnosis of CD (14 men and 16 women) and 38 age- and sex-matched healthy controls (16 men and 22 women) | Questionnaire | Nuts (*P*░=░0.038), were associated with decreased risk for CD |
| Alasalvar et al., 2003135 | Research |  |  |  | Tombul hazelnut serves as a good source of vital nutrients and taste active components |
| Perna et al., 2016136 | Review and meta-analysis |  |  |  | Hazelnuts have important antioxidant compounds |
| Wu and Schauss, 2012137 | Review |  |  |  | Polyphenols and other types of compounds, found in various dietary factors including nuts can play an important role in attenuating and mitigating chronic pro-inflammatory processes associated with chronic diseases |

Table 12 Spices intake and IBD.

| Author | Type of study | Vitro animals–humans | Subjects | Dietary products used | Results |
| --- | --- | --- | --- | --- | --- |
| Triantafillidis et al., 2016140 | Review |  |  |  | Such evidence-based scientific observations and case reports may encourage to undertake large scale clinical trials to assess the long-term safety and efficacy of the alternative therapies for treating CD and UC in humans |
| Gupta et al., 2015158 | Clinical study | Vivo – Mice | Mice | Piperine | Piperine inhibited abnormal secretion of pro-inflammatory mediators namely NO, cytokines TNF- and reduces FFA induced TLR4 mediated inflammation |
| Murakami et al., 2003147 | Clinical study | Vivo – Mice | Female ICR mice | ZER zerumbone One week prior to DSS administration, the experimental mice were fed ZER alone, nimesulide (NIM, a selective COX-2 inhibitor) alone, or both in combination (1000░ppm each) for a total of 2 weeks | Oral feeding of ZER significantly lowered the levels of IL-1beta [inhibitory rate (IR)░=░34%], TNF-alpha (IR░=░29%), and PGE(2) (IR░=░73%) and suppressed DSS-induced colitis |
| El-Abhar et al., 2008145 | Clinical study | Vivo – Rats | Male Wistar rats | GE, ginger extract received 3 different doses of GE, sulfasalazine, or vehicle for 3 consecutive days before induction of UC by intra-rectal acetic acid administration, and continued further for 7 days after the induction | Malondialdehyde (MDA), protein carbonyl (PCO), and reduced glutathione (GSH) with the catalase (CAT) and superoxide dismutase (SOD) activity, myeloperoxidase (MPO), tumor necrosis factor (TNF-alpha), and prostaglandin E2 (PGE2) improved in animals receiving GE |
| Rashidian et al., 2014146 | Clinical study | Vivo – Rats | Volatile oil of ginger | Ginger volatile oil with doses of 100, 200, and 400░mg/kg, prednisolone (4░mg/kg), or vehicle were administered orally to groups of male Wistar rats (*n*░=░6) for 5 d | Ginger volatile oil with all doses reduced colon weight/length ratio (*P*░<░0.01) and the effects were similar to the reference drugs. Higher oral doses of volatile oil (200 and 400░mg/kg) reduced ulcer severity (*P*░<░0.05 and *P*░<░0.01), ulcer area (*P*░<░0.01) and ulcer index (*P*░<░0.01). On the other hand, evaluation of microscopic scores showed that the dose of 400░mg/kg of volatile oil was effective to reduce inflammation severity (*P*░<░0.01) and inflammation extent (*P*░<░0.05) compared to the control group |
| Ajayi et al., 2015148 | Clinical study | Vivo – mice | Adult male mice | Adult male mice were exposed to DSS in drinking water alone or co-treated with 6-gingerol orally at 50, 100, and 200░mg/kg for 7 days | Reduction in body weight, diarrhea, rectal bleeding, and colon shrinkage to near normal. Moreover, 6-gingerol significantly suppressed the circulating concentrations of interleukin-1 and tumor necrosis factor alpha and restored the colonic nitric oxide concentration and myeloperoxidase activity to normal in DSS-treated mice. 6-Gingerol efficiently prevented colonic oxidative damage by increasing the activities of antioxidant enzymes and glutathione content, decreasing the hydrogen peroxide and malondialdehyde levels, and ameliorated the colonic atrophy in DSS-treated mice |
| Kadri et al., 2016152 | Clinical study | Rats | Thirty-six rats were subjected to a proximal colostomy and distal colonic fistulation | Oily extract of curcumin at 50░mg/kg/day or 200░mg/kg/day | Enemas containing curcumin improved the inflammation of the mucosa without a fecal stream and reduced the tissue contents of MPO. MPO tissue levels did not vary with time or between the concentrations of curcumin used |
| Yildirim et al., 2016153 | Clinical study | Mice | Sodium (DSS)-induced ulcerative colitis mice | Curcumin | Prophylactic application of curcumin resulted in higher MPO activity, less body weight loss and longer colon lengths compared to therapeutic group; DSS-induced decrease in liver and serum PON activities were completely recovered by prophylactic administration ofcurcumin. DSS-induced reduction in liver cytosolic -glucosidase activity was not affected by curcumin neither in the prophylactic group nor in the therapeutic group. Erythrocyte CA activity was significantly increased in curcumin groups, however no remarkable change in G6PD activity was observed |
| Gopu et al., 2015154 | Clinical study | Rats | Animals were randomly divided into four groups, each consisting of 12 animals: normal control group, acetic acid group, curcumin-treated group, and flunixin-treated group | Curcumin (50░mg/kg daily, p.o.) | , treatment with curcumin (50░mg/kg daily, p.o.) and flunixin (2.5░mg/kg daily, s.c.) decreased serum LDH, ALP, interleukin (IL)-1, and tumor necrosis factor- levels, as well as colonic MPO and lipid peroxide levels, whereas increased colonic prostaglandin E2 and IL-10 concentrations were observed |
| Isik et al., 2011149 | Clinical study | Rats | Rats | Black cumin oil (BCO, Origo ``100% natural Black Cumin Seed Oil,'' Turkey) was given to colitis░+░black cumin oil group by oral administration during 3 days, 5░min after colitis induction | Black cumin oil decreased the proinflammatory cytokines, lactate dehydrogenase, triglyceride, and cholesterol, which were increased in colitis |
| Minaiyan et al., 2011150 | Clinical study | Rats | Male Wistar rats (200░±░25░g) | Animals were randomly assigned to sham, control, test, and reference groups of at least 6 rats. Extract groups; treated orally with rosemary hydroalcoholic extract (RHE) at doses of 100, 200, and 400░mg/kg, and i.p. at doses of 100 and 400░mg/kg. Essential oil groups treated orally with rosemary essential oil (REO) at doses of 100, 200, and 400░g/kg, and i.p. at doses of 100 and 400░g/kg | The rosemary extract and essential oil inhibited the ulcerative lesion index both macroscopically and pathologically at their highest doses (400░mg/kg and 400░l/kg) used. At the lowest dose of extract and essential oil (100░mg/kg and 100░l/kg), lesion improvement was negligible in pathologic evaluation in spite of a significant healing in macroscopic parameters suggesting that ultimate anti-ulcerogenic activity had at least in part a relationship with the amount of doses used |
| Suskind et al., 2013155 | Prospective tolerability study | Humans | Eleven patients (7 male/4 female; 14.6░±░2.3 years, range 11–18 years) enrolled in the study. Six had Crohn’s disease and five had UC. Nine patients completed the study | Curcumin Patients initially received 500░mg twice per day for 3 weeks. Using the forced-dose titration design, doses were increased up to 1░g twice per day at week 3 for a total of 3 weeks and then titrated again to 2░g twice per day at week 6 for 3 weeks – in addition to standard therapy | Using doses of 1 gram twice a day over a 6 month period, patients receiving curcumin showed a significant decrease in relapse (4.6% vs. 20.5% *P*░=░0.04). Recurrence rates evaluated on the basis of intention to treat showed significant difference between curcumin and placebo (*P*░=░0.049). Furthermore, curcumin improved both clinical activity index (*P*░=░0.038) and endoscopic index (*P*░=░0.0001), thus suppressing the morbidity associated with UC |
| Hanai et al., 2006156 | Randomized, Multicenter, Double-Blind, Placebo-Controlled Trial | Humans | Eighty-nine patients with quiescent UC were recruited | Forty-five patients received curcumin, 1░g after breakfast and 1░g after the evening meal, plus sulfasalazine (SZ) or mesalamine, and 44 patients received placebo plus SZ or mesalamine for 6 months 43 patients in the curcumin group and 39 patients in the placebo group completed the study | The mean CAI in the curcumin group was improved from 1.3░±░1.1░at baseline to 1.0░±░2.0 at 6 months (*P*░=░0.038). Improved EI, 1.3░±░0.8 vs 0.8░±░0.6 (*P*░=░0.0001) |
| Holt et al., 2005157 | Open lab study | Humans | Five patients with ulcerative proctitis and five with Crohn's disease | Pure curcumin preparation | All proctitis patients improved, with reductions in concomitant medications in four, and four of five Crohn's disease patients had lowered CDAI scores and sedimentation rates |
| Pellegrini et al., 2016168 | Open-label, observational, registry study | Humans | Participants with UC in remission phase (*n*░=░43) | receive the oral daily Casperome supplementation (*n*░=░22) or no supplementation (*n*░=░21) for 4 weeks | A significant beneficial effect of Casperome was observed: diffuse intestinal pain, evident and occult blood in stools, bowel movements and cramps, watery stools, malaise, anemia, rectal involvement, number of white blood cells as well as need for concomitant drugs and medical attention. Fecal concentration of calprotectin, a marker of bowel inflammation, resulted ameliorated in Casperome supplemented patients |
| Triantafyllidi et al., 2015138 | Review |  |  |  | Although the number of the relevant clinical studies is relatively small, it can be assumed that the efficacy of herbal therapies in IBD is promising |
| Saxena et al., 2014139 | Review |  |  |  | There is a need for more clinical studies to declare these bioactive compounds as completely safe and effective |
| Gilardi et al., 2014141 | Review |  |  |  | There is a significant request for scientific data to evaluate both the efficacy and safety of these remedies, and to support the use of such medications as adjuvant treatments to biological and synthetic drugs |
| Yanai et al., 2016142 | Review |  |  |  | Since complementary and alternative medicine (CAM) has become very popular in real-life practice of Western Communities, caregivers must gain more knowledge about these therapies, their mechanism of action, benefits, and risks |
| Rahimi et al., 2009143 | Paper |  |  |  | Results from the use of herbal therapies for managing IBD are promising, and no serious adverse events have been reported from them. Herbal therapies show their benefit in managing IBD by different mechanisms such as immune system regulation, antioxidant activity, inhibition of leukotriene B4, inhibition of nuclear factor-kappa B (NF-kappaB), and antiplatelet activity |
| Joos, 2011144 | Review |  |  |  | Although most of the studies showed positive results, the methodological quality of most studies was rather low; therefore, the results had to be interpreted with caution |
| Harisa et al., 2009159 | Clinical study | Rats | Rats | Garlic (0.25░g/kgbwt, orally) for 4 consecutive weeks and 3 days during induction of colitis | Reduced the increase in the colon weight induced by acetic acid and ameliorated alterations in oxidant and antioxidant parameters. Interestingly, oral co-administration of garlic (0.25░g/kgbwt) and l-arginine (625░mg/kgbwt) for the same period of garlic administration mitigated the changes in both colon weight and length induced by acetic acid and increased garlic effect on colon tissue contents of MDA and GSH |
| Tang et al., 2011171 | Randomized, double-blind, multicentre, 8-week parallel group study | Humans with mild-to moderately active ulcerative colitis | 120 patients, 60 patients/group | Extract of *A. paniculata* 1200░mg/day compared with 4500░mg/day of slow release mesalazine (mesalamine) granules | HMPL-004 may be an efficacious alternative to mesalazine in ulcerative colitis |
| Sferra et al., 2012162 | Clinical study | Mice | Mice were assigned to 5 groups: controls; DMN without any treatment; DMN treated orally with Boswellia extracts (50░mg/kg/day); DMN treated orally with Salvia extracts (150░mg/kg/day); DMN treated orally with both Boswellia (50░mg/kg/day) and Salvia extracts (150░mg/kg/day) | Evaluation of liver | Co-treatment of Boswellia plus Salvia extracts is effective in preventing hepatic fibrosis in DMN-induced chronic hepatitis |
| Semalty et al., 2010166 | Review |  |  |  | Studies on PHYTOSOME |
| Sandborn et al., 2013170 | Randomized, double-blind, placebo-controlled trial | Humans | 224 adults with mild-to-moderate ulcerative colitis | A*. paniculata* 1200░mg and 1800░mg daily or placebo | Patients with mildly to moderately active ulcerative colitis treated with *A. paniculata* extract (HMPL-004) at a dose of 1800░mg daily were more likely to achieve clinical response than those receiving placebo |
| Kiela et al., 2005160 | Clinical study | Mouse |  |  | Boswellia does not ameliorate symptoms of colitis in chemically induced murine models and, in higher doses, may become hepatotoxic. Potential implications of prolonged and uncontrolled intake of boswellia as an herbal supplement in inflammatory bowel disease and other inflammatory conditions should be considered in future clinical trials with this botanical |
| Hamid and Zhiyu, 2009151 | Clinical study | Mice |  |  | Crocetin exerts beneficial effects in experimental colitis, and therefore we propose that this carotenoid may have therapeutic implications for human UC and can be administered along with the conventional therapy of UC |
| Hüsch et al., 2013167 | Clinical study | Female albino Wistar rats | non-formulated BE (240░mg BSE/kg) or one of two dose levels of Casperome (*n*░=░6 each) |  | results provide a rationale for investigating the clinical potential of Casperome in a variety of conditions where preclinical evidence of action for BE has been reported |
| Huber et al., 2007172 | open-label, dose-escalating study | Humans | Sixteen patients with active UC | Tormentil extracts – 1200, 1800, 2400 and 3000░mg/d | TE appeared safe up to 3000░mg/d. Tannins from TE are not systemically absorbed. The efficacy in patients with UC should be further evaluated |
| Gupta et al., 1997163 | Clinical study | Humans | Humans with UC | *B. serrata* gum resin preparation (350░mg thrice daily for 6 weeks) | All parameters tested improved after treatment with *B. serrata* gum resin, the results being similar compared to controls: 82% out of treated patients went into remission; in case of sulfasalazine remission rate was 75% |
| Gupta et al., 2001164 | Clinical study | Humans | Thirty patients, 17 males and 13 females in the age range of 18 to 48 years with chronic colitis were included | Twenty patients were given a preparation of the gum resin of *B. serrata* (900░mg daily divided in three doses for 6 weeks) and ten patients were given sulfasalazine (3 gm daily divided in three doses for 6 weeks) and served as controls | A gum resin preparation from *B. serrata* could be effective in the treatment of chronic colitis with minimal side effects |
| Fernández-Bañares et al., 1999169 | open label, parallel-group, multicenter, randomized clinical trial | Humans | 105 patients with ulcerative colitis who were in remission | Plantago ovata seeds (10░g b.i.d.), mesalamine (500░mg t.i.d.), and Plantago ovata seeds plus mesalamine at the same doses | Plantago ovata seeds (dietary fiber) might be as effective as mesalamine to maintain remission in ulcerative colitis |
| Du et al., 2015165 | Review |  |  |  | Evaluate the effects of Boswellic acids |
| Anthoni et al., 2006161 | Clinical study | Vitro |  |  | Consequently, AKBAs may warrant further attention as a potential alternative to existing medications (such as dexamethasone) that are used to treat patients with IBD |

Table 13 Sweetner and sugar intake and IBD.

| Author | Type of study | Vitro Animals-Humans | Subjects | Dietary Products Used | Results |
| --- | --- | --- | --- | --- | --- |
| Knight-Sepulveda et al., 201528 | Review |  |  |  | Patients with inflammatory bowel disease (IBD) are increasingly becoming interested in nonpharmacologic approaches to managing their disease. One of the most frequently asked questions of IBD patients is what they should eat. The role of diet has become very important in the prevention and treatment of IBD. Although there is a general lack of rigorous scientific evidence that demonstrates which diet is best for certain patients, several diets—such as the low–fermentable oligosaccharide, disaccharide, monosaccharide, and polyol diet; the specific carbohydrate diet; the anti-inflammatory diet; and the Paleolithic diet—have become popular. This article discusses the diets commonly recommended to IBD patients and reviews the supporting data |
| Qin, 2011176 | Letter to the editor |  |  |  | It would not be surprising that dietary chemicals like saccharin could have a much greater impact on the general population than antibiotics due to its wide, daily use. In addition to saccharin, many other chemicals are used as food additives in modern society. Some of them may also be capable of inhibiting gut bacteria. Therefore, the role of dietary chemicals on gut bacteria and IBD would be worthy of further study |
| Qin, 2012177 | Clinical study |  |  |  | Recently I further found evidence suggesting sucralose may be also linked to IBD through a similar mechanism as saccharin and have contributed to the recent worldwide increase of IBD. This new hypothesis suggests that UC and CD are just two symptoms of the same morbidity, rather than two different diseases. They are both caused by a weakening in gut barrier and only differ in that UC is mainly due to increased infiltration of gut bacteria and the resultant recruitment of neutrophils and formation of crypt abscess, while CD is mainly due to increased infiltration of antigens and particles from gut lumen and the resultant recruitment of macrophages and formation of granulomas. It explained the delayed appearance but accelerated increase of CD over UC and many other phenomena. This paper aims to provide a detailed description of a unified hypothesis regarding the etiology of IBD, including the cause and mechanism of IBD, as well as the relationship between UC and CD |
| Page, 2014175 | Review |  |  |  | The factors behind the increased prevalence of IBD in these countries remains unknown, although some researchers point to the ``hygiene hypothesis,'' which points to autoimmunity mediated by a lack of exposure to pathogens. With rapid industrialization occurring in China, epidemiologists are observing a predictable increase in the prevalence of IBD, similar to the increase in prevalence that occurred in the United States over the past century. Between 2000 and 2010, researchers in China reported a 12-fold increase in the incidence of IBD among children living in Shanghai. These results were followed by multicenter analyses, such as a 17-hospital nationwide study in which investigators identified several factors associated with the rising prevalence of IBD. These factors included smoking, appendectomy, stress, socioeconomic conditions, use of nonsteroidal anti-inflammatory drugs, oral contraceptive use, breastfeeding, infections, stress, family sanitary conditions, spicy food intake, and refined sugar intake. The last 2 factors, sugar intake and spicy food consumption, have also been identified as a factor in the pathogenesis in IBD in studies across Europe and the United States, although reductions in the incidence of IBD were not observed with restriction of sugar intake |
| Ruemmele, 2016179 | Review |  |  |  | An interesting hypothesis is that environmental (food-) triggered changes of the intestinal microbiome might cause a proinflammatory state preceding the development of IBD. Indeed, an intact intestinal epithelial barrier assuring a normal bacterial clearance of the intestinal surface is crucial to guarantee intestinal homeostasis. Any factors affecting the epithelial barrier function directly or indirectly may impact on this homeostasis, as well as any changes of the intestinal microbial composition. It is intriguing to learn that some frequently used food components impact on the quality of the intestinal barrier, as well as on the composition of the intestinal microbiome. This highlights the close interaction between living conditions, hygiene, food habits and food quality with the bacterial composition of the intestinal microbiome and the activation status of the intestinal immune system. There is clear evidence that nutritional therapy is highly successful in the treatment of Crohn’s disease (CD). Exclusive enteral nutrition is well established as induction therapy of CD. New diets, such as a CD exclusion diet or defined diets (specific carbohydrate diets, FODMAP diet, Paleolithic diet) are being discussed as treatment options for IBD. Well-designed clinical trials in IBD are urgently required to define the precise role of each of these diets in the prevention or management of IBD. Up to now, the role of diet in IBD is highly undermined by lay and anecdotal reports without sufficient scientific proof |
| Sakamoto et al., 2005174 | A multicenter hospital-based case–control study | Human | Cases were IBD patients aged 15 to 34 years [ulcerative colitis (UC) 111 patients; Crohn’s disease (CD) 128 patients] within 3 years after diagnosis in 13 hospitals | A semiquantitative food frequency questionnaire was used to estimate pre-illness intakes of food groups and nutrients | All the available control subjects (*n*░=░219) were pooled, and unconditional logistic models were applied to calculate odds ratios (ORs). In the food groups, a higher consumption of sweets was positively associated with UC risk [OR for the highest versus lowest quartile, 2.86; 95% confidence interval (CI), 1.24–6.57], whereas the consumption of sugars and sweeteners (OR, 2.12; 95% CI, 1.08–4.17), sweets (OR, 2.83; 95% CI, 1.38–5.83), fats and oils (OR, 2.64; 95% CI, 1.29–5.39), and fish and shellfish (OR, 2.41; 95% CI, 1.18–4.89) were positively associated with CD risk. In respect to nutrients, the intake of vitamin C (OR, 0.45; 95% CI, 0.21–0.99) was negatively related to UC risk, while the intake of total fat (OR, 2.86; 95% CI, 1.39–5.90), monounsaturated fatty acids (OR, 2.49; 95% CI, 1.23–5.03) and polyunsaturated fatty acids (OR, 2.31; 95% CI, 1.12–4.79), vitamin E (OR, 3.23; 95% CI, 1.45–7.17), and n-3 (OR, 3.24; 95% CI, 1.52–6.88) and n-6 fatty acids (OR, 2.57; 95% CI, 1.24–5.32) was positively associated with CD risk. Although this study suffers from the shortcoming of recall bias, which is inherent in most retrospective studies (prospective studies are warranted to confirm the associations between diet and IBD risk), the present findings suggest the importance of dietary factors for IBD prevention |
| Schaubeck and Haller, 2015173 | Review |  |  |  | Diet is an emerging but poorly defined disease modulator in inflammatory bowel diseases (IBDs). Dietary factors exert direct effects on epithelial and immune cells and indirectly modulate immune homeostasis by shaping the intestinal microbiota. This review will discuss new insights of how nutrition or single dietary factors shape the intestinal ecosystem. Furthermore, we want to provide perspectives for clinical translation of this knowledge to treat or prevent IBD |
| Vagianos et al., 2016120 | A comprehensive study | Humans | 319 patients with IBD enrolled in the University of Manitoba IBD Cohort Study | Diets of those with IBD (*n*░=░256) were compared with a matched, non-IBD Canadian cohort using the nutrition questions obtained from the Canadian Health Measures Survey (CHMS) | Food avoidance among IBD is prevalent for alcohol, popcorn, legumes, nuts, seeds, deep-fried food, and processed deli meat, with a higher prevalence among those with active IBD. Patients with active IBD also consumed significantly more portions of sports drinks and sweetened beverages compared with those with inactive disease. Compared with the non-IBD Canadian population, patients with IBD consume significantly less iron-rich food but more milk |
| Yao et al., 2014178 | A randomized, double-blinded, placebo-controlled cross-over study | Humans | 21 healthy and 20 IBS subjects | The degree of absorption measured by breath hydrogen production and gastrointestinal symptoms (visual analog scales) was evaluated in a randomized, double-blinded, placebo-controlled study in 21 healthy and 20 IBS subjects after challenges with 10░g of sorbitol, mannitol or glucose | Certain fruits and sugar-free gum contained sorbitol, whereas mannitol content was higher in certain vegetables. Similar proportions of patients with IBS (40%) and healthy subjects (33%) completely absorbed sorbitol, although more so with IBS absorbed mannitol (80% versus 43%; *P*░=░0.02). Breath hydrogen production was similar in both groups after lactulose but was reduced in patients with IBS after both polyols. No difference in mean (SEM) hydrogen production was found in healthy controls after sorbitol [area-under-the-curve: 2766 (591)░ppm 4░h1] or mannitol [2062 (468)░ppm 4░h1] but, in patients with IBS, this was greater after sorbitol [1136 (204)░ppm 4░h1] than mannitol [404 (154)░ppm 4░h1; *P*░=░0.002]. Overall gastrointestinal symptoms increased significantly after both polyols in patients with IBS only, although they were independent of malabsorption of either of the polyols |

Table 14 Alcoholic beverages intake and IBD.

| Author | Type of study | Vitro animals–humans | Subjects | Dietary products used | Results |
| --- | --- | --- | --- | --- | --- |
| Hey et al., 2007183 | Crossover study | Humans | 12 healthy individuals and 20 patients with CD in remission | Red wine, white wine, Smirnoff Ice, Elephant Beer and pure ethanol | The plasma AUC for glucose in the CD patients after intake of Smirnoff Ice and Elephant beer was significantly increased (*P*░<░0.05) in comparison with that in the remaining three alcoholic drinks. Abdominal pain manifestations were significantly more pronounced in CD patients following intake of Smirnoff Ice and Elephant beer, with their higher sugar concentration, compared with intake of the remaining three drinks (*P*░<░0.05) |
| Ballo et al., 2012180 | Case report | Human | 65-year-old woman with a history of chronic alcohol abuse, obesity, and recent traumatic lumbar fracture |  | Chronic alcohol abuse may lead to acute reversible inflammatory bowel disease, refractory diarrhea and severe hypokalemia, with clinical and laboratory features that can mimic those of carcinoid syndrome |
| Swanson et al., 2010181 | Cross-sectional survey of IBD patients done by questionnaire | Humans | 129 consecutive patients: 52 patients with Crohn’s Disease, 38 patients with Ulcerative Colitis, and 39 patients with Irritable Bowel Syndrome (IBS) |  | The rate of current drinkers was 54% in CD, 61% in UC, and 49% in IBS. There was no statistical differences between the rates of abstainers, current drinkers, light, moderate, or heavy drinkers between the three groups. Current drinkers with inactive IBD reported a statistically significant worsening of GI symptoms with alcohol when compared to the current drinkers with IBS (*P*░=░0.01). No difference between the severity of other self reported GI symptoms of alcohol consumed per week in IBD or IBS subjects. The severity of GI symptoms did differ significantly between disease groups, with IBS patients reporting more severe GI symptoms than IBD (*P*░=░0.02) |
| Vagianos et al., 2016120 | Clinical study | Humans | 319 patients |  | Food avoidance among IBD is prevalent for alcohol, popcorn, legumes, nuts, seeds, deep-fried food, and processed deli meat, with a higher prevalence among those with active IBD. Patients with active IBD also consumed significantly more portions of sports drinks and sweetened beverages compared with those with inactive disease |
| MacDermott, 2007182 | Review |  |  |  | Alcoholic beverages (hard liquor, wine, or beer) can lead to very severe diarrhea |

Table 15 Vitamin D intake and IBD.

| Author | Type of study | Vitro animals–humans | Subjects | Dietary products used | Results |
| --- | --- | --- | --- | --- | --- |
| Del Pinto et al., 2015185 | A Systematic review and meta-analysis |  | Adults |  | Meta-analysis showed that patients with IBD had 64% higher odds of vitamin D deficiency when compared to controls (OR░=░1.64; 95% CI: 1.30, 2.08; I2░=░7%; *P*░<░0.0001). UC patients had more than double the odds of vitamin D deficiency when compared to normal controls (OR░=░2.28; 1.18, 4.41; I2░=░41%; *P*░=░0.01). Latitude did not influence the association between IBD and vitamin D deficiency (*P*░=░0.34) |
| Frigstad et al., 2017186 | Observational, multicenter study | Humans | 408 patients > 17 years (230 CD patients and 178 UC patients) | serum 25-hydroxyvitamin D (25-OH-D) analyses | In total, 49% (200/408) of the patients had a 25-OH-D concentration < 50░nmol/l, including 53% (122/230) of the Crohn’s disease (CD) patients and 44% (78/178) of the ulcerative colitis (UC) patients. In CD patients, disease activity, measured as the HBI, was inversely associated with vitamin D deficiency. No such association was observed with the Simple Clinical Colitis Activity Index (SCCAI) scores in UC, but in UC patients, vitamin D deficiency was associated with elevated fecal calprotectin > 100░mg/kg |
| Ghaly and Lawrance, 2014188 | Review |  |  |  | Vitamin D deficiency is common in both Crohn’s disease and ulcerative colitis and it/’s responsible of increased risk of developing inflammatory bowel diseases (IBD) in areas of low UV exposure, more active disease and worse outcomes such as hospitalization and surgery, and a reduced muscle bulk |
| Gubatan et al., 2017189 | A physician-blinded prospective study | Humans | 70 patients with UC in clinical remission | Levels of 25-hydroxy-vitamin D are measured | The mean baseline vitamin D level was lower among patients with relapse (29.5░ng/ml) than without (50.3░ng/ml) (*P*░=░0.001). Remission vitamin D level (≤35░ng/ml) was associated with risk of clinical relapse (odds ratio [OR], 1.25; 95% confidence interval [CI], 1.01–1.56; *P*░=░0.044) over 12 months, independent of endoscopic or histologic grade at enrollment. A receiver operating characteristic curve of vitamin D levels for the outcome of relapse had an area under the curve of 0.72; a serum level ≤35░ng/ml had a sensitivity of 70% (95% CI 46%–88%) and specificity of 74% (95% CI 57%–83%) for predicting risk of clinical relapse |
| Hlavaty et al., 2014190 | A retrospective study | Humans | A cohort of 220 IBD patients: 141 CD and 79 UC patients (> 18 years old) | 400–1000░IU (a median of 800░IU/day) Vitamin D supplements for > 3 months | During the summer/autumn and the winter/spring period, 28% and 42% of IBD patients were VD-deficient (< 20░ng/ml), respectively. In the winter/spring period, there was a significant correlation between sIBDQ score and VD serum concentration in UC patients (*r*░=░0.35, *P*░=░0.02), with a trend toward significance in CD patients (*r*░=░0.17, *P*░=░0.06). In the winter/spring period, VD-insufficient patients (< 30░ng/ml) had a significantly lower mean sIBDQ score than VD-sufficient patients; this was true of both UC (48.3░±░2.3 vs. 56.7░±░3.4, *P*░=░0.04) and CD (55.7░±░1.25 vs. 60.8░±░2.14, *P*░=░0.04) patients. In all analyzed scenarios (UC/CD, the summer/autumn period and the winter/spring period), health related quality of life was the highest in patients with VD serum concentrations of 50–59░ng/ml. Supplementation with a median of 800░IU/d VD day did not influence VD serum concentration or the sIBDQ score |
| Kabbani et al., 2016 | A longitudinal study | Humans | 965 IBD patients (61.9% Crohn’s disease, 38.1% ulcerative colitis) with up to 5-year follow-up | This protocol involves prescribing 50,000░IU of weekly or biweekly vitamin D supplements for at least 12 weeks | 29.9% patients had low mean vitamin D levels. Over the 5-year study period, subjects with low mean vitamin D required significantly more steroids, biologics, narcotics, computed tomography scans, emergency department visits, hospital dmissions, and surgery compared with subjects with normal mean vitamin D levels (*P*░<░0.05). Moreover, subjects with low vitamin D levels had worse pain, disease activity scores, and quality of life (*P*░<░0.05). Finally, subjects who received vitamin D supplements had a significant reduction in their health-care utilization |
| Mouli and Ananthakrishnan, 2014184 | Review |  |  |  | Vitamin D deficiency is common in patients with inflammatory bowel diseases (IBD) (16–95%) including those with recently diagnosed disease. Evidence supports immunological role of vitamin D in IBD. In animal models, deficiency of vitamin D increases susceptibility to dextran sodium sulfate colitis, while 1,25(OH)2 D3 ameliorates such colitis. One prospective cohort study found low predicted vitamin D levels to be associated with an increased risk of Crohn's disease (CD). Limited data also suggest an association between low vitamin D levels and increased disease activity, particularly in CD. In a large cohort, vitamin D deficiency (< 20░ng/ml) was associated with increased risk of surgery (OR 1.8, 95% CI 1.2–2.5) in CD and hospitalisations in both CD (OR 2.1, 95% CI 1.6–2.7) and UC (OR 2.3, 95% CI 1.7–3.1). A single randomized controlled trial demonstrated that vitamin D supplementation may be associated with reduced frequency of relapses in patients with CD compared with placebo (13% vs. 29%, *P*░=░0.06) |

Table 16 Calcium intake and IBD.

| Author | Type of study | Vitro animals–humans | Subjects | Dietary products used | Results |
| --- | --- | --- | --- | --- | --- |
| Adriani et al., 2014192 | Clinical trial | Human | 37 (26 females, median age 35.6░±░14.5 years) consecutive patients | Evaluation of dual-energy X-ray absorptiometry (DXA) at the lumbar spine and intact parathormone (PTH), 25-hydroxy vitamin D and urinary cross-links | Sixteen of 37 patients (43%) had normal DXA, 17 (46%) were osteopenic and 4 (11%) osteoporotics. Most male patients > 30 years (63%) old as well as young women (62%) had osteopenia/osteoporosis. Mean value of intact-PTH was significantly higher in women > 50 years (55.0░±░18.1░pg/ml) compared with those aged 16–20 years (30.0░±░14.6░pg/ml) (*P*░=░0.042). Furthermore, there was a significant difference between mean value of 25-hydroxy vitamin D in women > 50 years old (16.2░±░4.7░ng/ml) compared to those aged 21–30 years (26.6░±░7.9░ng/ml) (*P*░=░0.041). Intact-PTH was significantly higher in osteoporotic patients (55.7░±░12.7░pg/ml) compared to normal subjects (28.3░±░13.0░pg/ml) (*P*░=░0.0014) |
| Ali et al., 2009191 | Review |  |  |  | Osteoporosis commonly afflicts patients with inflammatory bowel disease, and many factors link the 2 states together. A literature review was conducted about the pathophysiology of osteoporosis in relation to inflammatory bowel disease. Screening guidelines for osteoporosis in general as well as those directed at patients with inflammatory bowel disease are reviewed, as are currently available treatment options. The purpose of this article is to increase physician awareness about osteopenia and osteoporosis occurring in patients with inflammatory bowel disease and to provide basic, clinically relevant information about the pathophysiology and guidelines to help them treat these patients in a cost-effective manner |
| American gastroenterological association., 2003195 | Guidelines |  |  |  |  |
| Ghishan and Kiela, 2011193 | Review |  |  |  | Chronic inflammatory disorders such as inflammatory bowel diseases (IBDs) affect bone metabolism and are frequently associated with the presence of osteopenia, osteoporosis, and increased risk of fractures. Although several mechanisms may contribute to skeletal abnormalities in IBD patients, inflammation and inflammatory mediators such as TNF, IL-1, and IL-6 may be the most critical. It is not clear whether the changes in bone metabolism leading to decreased mineral density are the result of decreased bone formation, increased bone resorption, or both, with varying results reported in experimental models of IBD and in pediatric and adult IBD patients. New data, including our own, challenge the conventional views, and contributes to the unraveling of an increasingly complex network of interactions leading to the inflammation associated bone loss. Since nutritional interventions (dietary calcium and vitamin D supplementation) are of limited efficacy in IBD patients, understanding the pathophysiology of osteopenia and osteoporosis in Crohn’s disease and ulcerative colitis is critical for the correct choice of available treatments or the development of new targeted therapies. In this review, we discuss current concepts explaining the effects of inflammation, inflammatory mediators and their signaling effectors on calcium and phosphate homeostasis, osteoblast and osteoclast function, and the potential limitations of vitamin D used as an immunomodulator and anabolic hormone in IBD |
| Lim et al., 2014197 | Clinical trial | Humans | 41 subjects were classified into normal group (*n*░=░21) and malnourished group (*n*░=░20) | The dietary habit, nutrient intake, and BMD have surveyed | The serum C-reactive protein (CRP) was significantly higher and serum calcium was significantly lower in the malnourished group. Lower bone density subjects were more in the malnourished group but no significant difference. Intake of energy, protein, carbohydrate, fiber, iron, sodium, potassium, zinc, vitamin B6, vitamin C and folate were significantly lower in the malnourished group. The BMD of malnourished group showed correlation with triceps skin fold thickness (TSF), CRP, dietary calcium, phosphorous, iron, animal iron, zinc and vitamin |
| Radhakrishnan et al., 2013194 | Clinical trial | Mice | Mice with colitis | Administration of 2,4,6-trinitrobenzenesulfonic acid (TNBS) or transfer of CD4░+░IL10/ and CD4+, CD45RBhi T cells | Mice with colitis had normal serum levels of Ca2+ and parathormone. Computed tomography analysis demonstrated decreased density of cortical and trabecular bone, and there was biochemical evidence for reduced bone formation and increased bone resorption. Increased fractional urinary excretion of Ca2+ was accompanied by reduced levels of TRPV5 protein in distal convoluted tubules, with a concomitant increase in TRPV5 sialylation. In mIMCD3 cells transduced with TRPV5 adenovirus, the inflammatory cytokines tumor necrosis factor (TNF), interferon (IFN), and interleukin 1 reduced levels of TRPV5 on the cell surface, leading to its degradation. Cytomix induced interaction between TRPV5 and UBR4, an E3 ubiquitin ligase; knockdown of UBR4 with small interfering RNAs prevented cytomix-induced degradation of TRPV5 |
| Rondanelli et al., 2013198 | Review |  |  |  | Osteoporosis is a leading cause of morbidity and mortality in the elderly and influences quality of life, as well as life expectancy. Currently, there is a growing interest among the medical scientists in search of specific nutrients and/or bioactive compounds of natural origin for the prevention of disease and maintenance of bone health. Although calcium and vitamin D have been the primary focus of nutritional prevention of osteoporosis, a recent research has clarified the importance of several additional nutrients and food constituents. Based on this review of the literature, supplementation with vitamins B, C, K, and silicon could be recommended for proper maintenance of bone health, although further clinical studies are needed. The results of studies on long-chain polyunsaturated fatty acids, potassium, magnesium, copper, selenium, and strontium are not conclusive, although studies *in vitro* and in animal models are interesting and promising |
| Vernia et al., 2014196 | Clinical trial | Humans | 187 IBD patients, 420 normal- and 276 diseased controls | A 22-item quantitative validated frequency food questionnaire was used for quantifying dietary calcium in relation to gender and age | The mean calcium intake was 991.0░±░536.0 (105.8% Recommended Daily Allowances) and 867.6░±░562.7 SD mg/day (93.8% RDA) in healthy and diseased controls, and 837.8░±░482.0 SD mg/day (92.7% RDA) in IBD, *P* 0.001. Calcium intake was high in celiac disease (1165.7░±░798.8 SD mg/day, 120% RDA), and non-significantly lower in ulcerative colitis than in Crohn's disease (798.7░±░544.1 SD mg/day vs. 881.9░±░433.0). CD and UC females, but not males, had a mean calcium intake well under RDA. In all study groups the intake was lower in patients believing that consumption of lactose containing food induced symptoms, versus those who did not (105.8% vs. 114.3% RDA in normal controls; 100.4% vs. 87.6% RDA in IBD) |

Table 17 Omega 3 intake and IBD.

| Author | Type of study | Vitro animals–humans | Subjects | Dietary products used | Results |
| --- | --- | --- | --- | --- | --- |
| Reddy and Naidu, 2016105 | Clinical study | Animals | Female Wistar rats | 4 diets: n-6, low n-3, n-6/n-3 and n-3 fatty acids for 8 weeks prior to mating, during gestation and lactation periods | Fatty acid analysis has shown that the arachidonic acid/docosahexaenoic acid ratio was significantly lower in liver, RBC, colon and spleen in n-6/n-3 and n-3 diet groups |
| Reifen et al., 2015202 | Clinical study | Animals and Caco-2 *in vitro* | Male Wistar rats (170–190░g) | Rats were fed diets rich in corn, fish or sage oil with or without vitamin A | Colitic rats fed the sage oil diets had a lower inflammatory response, improved histological repair and had less necrotic damage in the mucosa when compared to the corn and fish oil groups. Colonic damage and myeloperoxidase activity were significantly lower. Colonic mRNA levels of pro-inflammatory genes including interleukin IL-6, cyclooxygenase 2 and tumor necrosis factor  were markedly down-regulated in rats fed fish and sage oils compared to control |
| Nieto et al., 2002199 | Clinical study | Animals | Rats | Rats were treated with 80░mg/kg body of 2,4,6-trinitrobenzenesulfonic acid and fed for 1 or 2 wk diets enriched in olive oil (OO), fish oil (FO), or purified pig brain phospholipids (BPL), as sources of monounsaturated and PUFA of the (n-3) and (n-3) _ (n-6) series | Rats with UC fed FO at 1 wk showed significantly less macroscopic and microscopic colonic damage. They also have lower alkaline phosphatase (AP), mieloperoxidase (MPO) activities and PGE2 levels compared with the OO and BPL groups and showed enhanced histological repair, less necrotic areas within the mucosa, and more goblet cells with mature mucin granules |
| Huang et al., 201691 | Clinical study | Animals | Male C57BL/6 mice | Mice were fed for 24 days with diets with soybean oil (S), a mixture of soybean oil and low fish oil content (LF), or high fish oil content (HF). The ratio of -6/-3 PUFA in the LF diet was 4:1, and that in the HF diet was 2:1 | Colitic groups with fish oil had lower inflammatory mediators in the plasma and colon lavage fluid. Furthermore, the percentages of blood Th1, Th2, and Th17 cells were lower, whereas Treg cell percentages were higher than those in the soybean oil group. The colitis group with an -6/-3 PUFA ratio of 2:1 had more pronounced effects than the group with a ratio of 4:1 |
| Huang et al., 2015200 | Clinical study | Animals | Male C57BL/6 mice at 6 weeks of age (weighed 19e20 g) | Mice were randomly assigned to 6 groups including 3 non-colitis groups (C, LF, and HF) and 3 colitis groups (DC, DLF, and DHF). Mice in the C and DC groups were fed a common semipurified diet with soybean oil as the fat source. The other groups received an identical component except that part of the soybean oil was replaced by different amounts of fish oil. The n-6/n-3 PUFA ratio of the LF and DLF groups was 4:1, the ratio of the HF and DHF groups was 2:1 | Fish oil-enriched colitis groups had lower inflammatory mediator expressions and higher PPAR-protein levels and IkBa/NF-B p65 ratios in colon tissues. The DHF group had even lower colonic inflammatory gene and higher PPAR- protein expressions than did the DLF group |
| Hillier et al., 1991201 | Clinical study | Humans | Twenty patients with active ulcerative colitis or Crohn's colitis were admitted to the study | Patients were allocated to receive capsules of fish oil (Maxepa) or olive oil three times a day on a random open basis for a 12 week study period | After three weeks' supplementation, the mean increases in eicosapentaenoic and docosahexaenoic acid were seven fold and 1.5 fold respectively, and these increases were maintained during the 12 week study. Arachidonic acid values fell throughout the study and this reduction was significant at 12 weeks. Mucosal prostaglandin E2 (PGE2), thromboxane B2, and 6-keto prostaglandin F1 synthesis were suppressed, and this reached significance (*P*░<░005) at three and 12 weeks for PGE2 and at 12 weeks for thromboxane B2 |
| Trebble et al., 2004206 | A randomized, double blind, placebo-controlled trial | Humans | Patients with CD | Fish oil (2.7 gEPA and DHA/d; *n*░=░31) or placebo (olive oil; *n*░=░31) for 24 wk The fish-oil group additionally received an antioxidant preparation (vitamins A, C, and E and selenium) | Fish-oil plus antioxidant dietary supplementation was associated with higher EPA and DHA incorporation into PBMCs (*P*░<░0.001) and lower arachidonic acid (*P*░=░0.006) and lower production of IFN- by mitogen-stimulated PBMCs (*P*░=░0.012) and of PGE2 by lipopolysaccharide-stimulated PBMCs (*P*░=░0.047) |
| Belluzzi et al., 1996209 | Randomized, double-blind, placebo-controlled study | Humans | 78 patients with Crohn’s disease | Nine fish-oil capsules containing a total of 2.7░g of omega 3 fatty acids or nine placebo capsules daily. A special coating protected the capsules against gastric acidity for at least 30░min | The patients receiving the fish-oil formula were significantly less likely to have relapses than the patients receiving placebo |
| Feagan et al., 2008210 | Two randomized, double-blind, placebo controlled studies | Humans | (1) 188 patients were assigned to receive omega-3 free fatty acids and 186 patients to receive placebo. (2) 189 and 190 patients respectively received omega-e or placebo | 4░g/d of omega-3 free fatty acids or placebo for up to 58 weeks | The rate of relapse at 1 year in EPIC-1 was 31.6% in patients who received omega-3 free fatty acids and 35.7% in those who received placebo Corresponding values for EPIC-2 were 47.8% and 48.8% |
| Aslan and Triadafilopoulos, 1992212 | Double-blind, placebo-controlled, cross-over study | Humans | 11 patients with UC | Supplementation with fish oil which provided about 4.2░g of omega-3 fatty acids per day – 8 months – 2.7░g of EPA per day | Fish oil supplementation results in clinical improvement of active mild to moderate UC but it is not associated with significant reduction in mucosal leukotriene B4 production, compared with placebo therapy |
| Stenson et al., 1992213 | Multicenter, randomized, double-blind, placebo-controlled, crossover trial | Humans | 24 patients with UC: 18 patients completed the study | 3.24░g of EPA per day – 4 months | Reduction of rectal dialysate leukotriene B4 levels, improvements in histologic findings, and weight gain |
| Yasueda et al., 2016207 | Open label clinical trial | Humans | 6 patients with CD in remission | Omega-3 emulsifying formulation | Supplementation is safe and useful for maintaining remission |
| Kuroki et al., 1997203 | Clinical study | Humans | 20 CD patients and 18 controls | Serum fatty acids were evaluated | Significant depletion of omega-3 PUFAs was observed in CD patients and the decrease was greater in patients with more active disease |
| Geerling et al., 2000208 | Randomized, double – blind, placebo, controlled study | Humans | 25 patients and 70 controls | 3 months of supplementation of AO or omega-3 | This supplementation have a role in the treatment of CD patients |
| Lorenz-Meyer et al., 1996211 | Randomized, controlled, Multicenter trial | Humans | 204 patients recruited after an acute relapse | 5░g/day of omega-3 (70 patients) or a carbohydrates reduced diet 3 (69 patients) or placebo 3 (69 patients) | Omega-3 fatty acids did not show an effect on extending the remission in Chron’s disease |
| Pearl et al., 2014204 | Clinical study | Humans | Biopsy samples were collected from 69 UC patients (54 providing both inflamed and non-inflamed mucosa) and 69 controls | Inflammation was graded endoscopically and histologically. Esterified and non-esterified fatty acids were determined within the biopsies using gas chromatography–mass spectrometry and liquid chromatography–mass spectrometry, respectively | Higher AA, AA:EPA ratio, DPA and DHA and lower LA, -LNA and EPA are seen in inflamed mucosa in UC and correlate with severity of inflammation |
| Barbalhoa et al., 2016205 | Review |  |  |  | More research is warranted to fully elucidate how these acids influence IBD and to define the daily amount recommended to help prevent or induce remission of IBD |

Table 18 Other micronutrient intake and IBD.

| Author | Type of study | Vitro animals–humans | Subjects | Dietary products used | Results |
| --- | --- | --- | --- | --- | --- |
| Yan et al., 2015217 | Clinical study | Vivo animals | Male C57BL/6 mice | Control group, DSS group, and DSS plus ascorbic acid treated group | Ascorbic acid significantly reduced clinical signs, inflammatory cytokines, myeloperoxidase (MPO) and malonaldehyde (MDA) activities, whereas the activities of superoxide dismutase (SOD), catalase (CAT) and glutathione peroxidase (GPx) were increased in DSS-induced mice. In addition, ascorbic acid was capable of inhibiting NF-B, COX-2 and iNOS expression in the colonic |
| Shiraishi et al., 2016225 | Clinical study | Vivo, mice | C57BL/6J mice | Colitis was induced using dextran sulfate sodium (DSS) in mice fed either a vitamin K-deficient (Kdef) or a vitamin K-supplemented (K-sup) diet | IL-6 expression in lamina propria mononuclear cells was significantly higher in the K-def group than in the K-sup group |
| Costantini and Pala, 2013212 | Open label pilot study | Humans | 8 patients with ulcerative colitis and 4 patients affected by Crohn’s disease | Thiamine (orally): dosage ranged from 600░mg/day (60░kg) to 1500░mg/day (90░kg) | In 10 patients, the values of the chronic fatigue syndrome (CFS) scale after therapy was equal to zero |
| Castro Aguilar-Tablada et al., 2016260 | Clinical study | Humans | 106 IBD patients (53 with ulcerative colitis (UC) and 53 with Crohn’s disease (CD)) and 30 healthy controls | Evaluation of Se in serum samples | Se concentrations were significantly lower in UC and CD patients than in healthy controls (*P*░<░0.001) and significantly lower in CD patients than in UC patients (*P*░=░0.006) and are correlated with other nutritional aspects |
| Soares-Mota et al., 2015220 | Cross-sectional study | Humans | 38 individuals with CD and 33 healthy controls | Vitamin A nutritional status was measured by serum retinol obtained by high performance liquid chromatography and the relative dose response (RDR) test for evaluation of the hepatic stores | Low serum retinol concentrations were detected in 29% of CD patients vs 15% in controls (*P*░<░0.005). The RDR test was positive in 37% of CD patients vs 12% in controls, which indicated inadequate hepatic vitamin A stores (*P*░<░0.005) |
| Ananthakrishnan et al., 2015265 | Prospective cohort study | Humans | 170,776 women | Zinc intake ranged from 9░mg/day in the lowest quintile to 27░mg/day in the highest quintile – assessed by questionnaire | Compared with women with the lowest quintile of intake, the multivariate hazard ratios (HR) for CD were 0.92 (95% confidence interval (CI), 0.65–1.29) for women in the second quintile of intake, 0.60 (95% CI, 0.40–0.89) for the third quintile, 0.57 (95% CI, 0.38–0.86) for fourth quintile and 0.74 (95% CI, 0.50–1.10) for the highest quintile (*P* trend░=░0.003). The association was stronger for dietary zinc (HR 0.63, 95% CI, 0.43–0.93, comparing extreme quintiles) than for zinc intake from supplements. Neither dietary nor supplemental zinc modified risk of UC |
| Nagy et al., 2013261 | Review |  |  |  | It is encouraging that in animal studies obvious preventive effect of Se has been found on IBD and chronic inflammation induced colon cancer (CICC) |
| Abitbol et al., 2015253 | Prospective cohort study | Humans | One-hundred fifty patients with median age 38 years (16–78) and Crohn disease (*n*░=░105), ulcerative colitis (*n*░=░43), or unclassified colitis (*n*░=░2) were included |  | TfR-F in addition to ferritin < 30░ng/ml criterion increased by 36% diagnosis rates of iron deficiency |
| Abhyankar and Moss, 1981255 | Review and meta-analysis | Humans | 694 patients |  | There was no significant difference between IV and PO iron in correcting iron-deficiency anemia in patients with IBD in this meta-analysis |
| Powell et al., 2013251 | Clinical study | Humans | 29 patients with inactive or mildly-active IBD and 28 healthy controls | Questionnaire | Dietary intakes of total iron, non-haem iron and vitamin C were significantly greater in IBD patients who were iron replete compared to those who were iron deplete (by 48%, 48% and 94% respectively; *P*░≤░0.05). The predicted percentage of available non-haem iron did not differ between these groups (19.7░±░2.0% vs. 19.3░±░2.0% respectively; *P*░=░0.25). However, because of the difference in iron intake, the overall amount of absorbed iron did (2.4░±░0.8░mg/d vs. 1.7░±░0.5░mg/d; *P*░=░0.013). No such differences were observed in the healthy control subjects |
| Avni et al., 2013254 | Systematic Review and meta-analysis | Humans | 973 patients | Meta-analysis for intravenous (IV) versus oral iron and for ESAs versus placebo | IV iron was associated with a higher rate of achieving Hb response in comparison to oral iron; RR 1.25 (95% CI 1.04–1.51, I2░=░2%, 4 trials), CRP levels and disease activity indexes were not significantly affected by IV iron. IV iron was associated with a decrease in adverse events that required discontinuation of intervention and without an increase in serious adverse |
| de Alvarenga Antunes et al., 2015248 | Cross-sectional study | Humans | 100 Crohn’s disease (CD) patients and 100 ulcerative colitis (UC) subjects | Evaluation of anemia | The overall prevalence of anemia in IBD was 21%. There was no significant difference in the prevalence of anemia between CD subjects (24%) and UC (18%). Moderate disease activity (OR: 3.48, 95% CI, 1.95–9.64, *P*░=░0.002) and elevated CRP levels (OR: 1.8, 95% CI, 1.04–3.11, *P*░=░0.02) were independently associated with anemia |
| Battat et al., 2014237 | Systematic review | Humans | 42 articles with a total of 3732 patients | Evaluate Cbl deficiency in IBD | Crohn’s disease without ileal resection, regardless of disease location in the ileum, did not increase the risk for Cbl deficiency. Ileal resections greater than 30░cm were associated with Cbl deficiency in Crohn’s disease, whereas those less than 20░cm were not. The effects of 20–30░cm resections were inconsistent. Ulcerative colitis did not predispose to deficiency. All studies failed to use confirmatory biomarker testing as stipulated by diagnostic guidelines for Cbl deficiency |
| Leddin et al., 2013236 | Review |  |  |  | It is possible that the rise in IBD in Canada was due, in part, to the adoption of processed flour in the early 1900s, a change that was partly reversed with the addition of folate to flour in 1997/1998 |
| Verma et al., 2016223 | Cohort study | Humans | Fifty-one adult patients (> 18 years of age) with left-sided colitis or pancolitis were included (23 in remission and 28 with active disease) |  | Serum VA levels inversely correlated with disease activity in UC patients; however, a larger sample size in both control and patient populations will be required to validate the findings. No significant correlation was observed between mucosal IL-23R and FOXP3 expression and serum VA levels as well as disease activity parameters in patients with UC, suggesting that instead of serum VA, tissue RA level should be investigated for correlating with the immune markers to get the real effect of RA on Th17 and Treg pathways *in vivo* |
| Nowak et al., 2014226 | Cross-sectional study | Humans (children) | 63 children with Crohn’s disease (CD) and 48 with ulcerative colitis (UC) | Assess vitamin K status | Prevalence of vitamin K deficiency was 54.0% in CD and 43.7% in UC |
| Selhuba et al., 2013229 | Clinical study | Vivo, mice | Weanling IL-10/ (positive for *Helicobacter hepaticus*) mice | Fed diets containing 0.5 (deficient), 6.0 (replete) or 24 (supplemented) mg/kg pyridoxine HCl for 12 weeks | Both low and high plasma PLP were associated with a significant suppression of molecular (TNF, IL-6, IFN-, COX-2 and iNOS expression) and histological markers of inflammation in the colon. PLP is required for the breakdown of sphingosine 1-phosphate (S1P), a chemotactic lipid, by S1P lyase. Colonic concentrations of S1P and PLP were significantly and inversely correlated |
| Goldenberg et al., 2013252 | Cohort study | Humans | 280 participants | Assess iron deficiency | Iron deficiency was identified in 20% with Crohn’s disease and 27% with ulcerative colitis. Anemia was identified overall in 50 (18%), with 230 who were nonanemic. In the nonanemic subgroup, there were no significant differences between iron-deficient and – sufficient groups in mean fatigue levels or proportions with problematic fatigue. There was no unique contribution of iron deficiency to problematic fatigue after adjustment for active disease and anemia |
| Ward et al., 2015238 | Review | Humans | 381 patients with CD who underwent B12 assessment (holoTC/MMA) and compared them with 141 patients with ulcerative colitis. Eighty-nine patients with CD underwent paired serum B12 and holoTC |  | Prevalence of B12 deficiency among patients with CD was 33% compared with 16% in ulcerative colitis (*P*░<░0.0001). In 89 patients who underwent paired tests, conventional testing identified B12 deficiency in 5% of patients with CD, which increased to 32% using holoTC/MMA |
| Kudva et al., 2015262 | Review |  |  |  | The role of the intestinal microbiome in modulating inflammation and aiding in selenium-dependent resolution of gut injury is highlighted to provide novel insights into the beneficial effects of selenium in IBD |
| O’Connor et al., 2014227 | Randomized control trial | Humans | Patients with CD (n 10 per group) in study A patients with CD (n 43 patients per group) in study B | 1000–2000░g of phylloquinone in study A (2 weeks) In study B1000░g of phylloquinone (12 months) | Compared with the placebo, supplementation with 1000░g of phylloquinone daily for 12 months had no significant effect (*P*░>░0.1) on bone turnover markers or on the bone mass of the lumbar spine or femur, but modestly increased (*P*░<░0.05) the bone mass of the total radius |
| Zheng et al., 2016239 | Clinical study | Humans | 307 CD patients (CD group) and 574 healthy controls (control group) of Han ethnicity | Evaluation of TCN2 gene polymorphisms, folate and vitamin B12 | TCN2 rs1801198 mutation might be associated with increased risk of structuring CD. TCN2 rs9606756 mutation might be a potential functional locus to affect CD susceptibility. Individuals carrying the haplotype (GG) formed by TCN2 (rs1801198 and rs9606756) seem to be at higher risk of developing CD. Hyperhomocysteinemia, folate deficiency, and vitamin B12 deficiency are prevalent in this cohort of CD patients of Han ethnicity from Zhejiang province. Both folate deficiency and vitamin B12 deficiency are independent risk factors for CD |
| Bermejo et al., 2013232 | Prospective study | Humans | 180 consecutive Crohn’s disease patients. Controls were ulcerative colitis patients (*n*░=░70) | Evaluation of deficiency | The prevalence of B12 deficiency in Crohn’s disease was 15.6% compared with 2.8% in ulcerative colitis. With regard to folate deficiency, the prevalence in patients with Crohn’s disease was 22.2 compared with 4.3% in ulcerative. 7.8% of Crohn’s disease patients had macrocytic anemia. Ileal resection was found to be a risk factor for B12 deficiency and disease activity a risk factor for folate deficiency |
| Nemes et al., 2016250 | Review |  |  |  | In the management of IBD is important to distinguish between different types of anemia |
| Barbalho et al., 2016205 | Review |  |  |  | The use of VA and VD could be helpful in the treatment and prevention of IBDs but more studies are necessary to establish the precise role of these compounds in the prevention or remission of these inflammatory processes |
| Martin et al., 2016249 | Review |  |  |  | Anemia in IBD is polyaetiological, reaching far beyond iron deficiency anemia. While clinicians need to be aware of the increasing pallet of diagnostic tools and therapeutic options, detailed studies are needed to develop more convenient test procedures, long-term treatment and monitoring strategies, and unified guidelines for daily practice |
| Weisshof and Chermesh, 2015214 | Review |  |  |  | Iron deficiency is the most common cause for anemia. Definite diagnosis of B12 deficiency cannot be established by serum levels alone. Vitamin D and vitamin K deficiencies are thought to be associated with heightened inflammatory state. The relationship of these deficiencies with bone disease is controversial |
| Alkhouri et al., 2013215 | Retrospective chart review of all of the patients diagnosed as having IBD from 2006 to 2010 | Humans 1–18 years | Total of 61 patients with IBD and 61 age- and sex-matched controls were included |  | Vitamin B12 and folate deficiencies are rare in children with newly diagnosed IBD in the United States and we question whether routine monitoring is warranted. Vitamin A and zinc deficiency are common in patients with newly diagnosed IBD and levels should be assessed at the time of diagnosis so that enteral repletion can commence. Vitamin D deficiency is common in all of the children in the Buffalo, NY, area, and routine screening for this deficiency is warranted |
| Nielsen et al., 2015257 | Systematic review | A total of 632 articles were reviewed, and 13 articles (2906 patients) with unique content were included |  |  | Oral iron therapy should be preferred for patients with quiescent disease stages and trivial iron deficiency anemia unless such patients are intolerant or have an inadequate response, whereas intravenous iron supplementation may be of advantage in patients with aggravated anemia or flares of IBD because inflammation hampers intestinal absorption of iron |
| Kruis and Nguyen, 2016216 | Review |  |  |  | Deficiencies of trace elements and vitamins are frequent events in CD. They may originate from very different causes, and they cause a wide range of symptoms and complications, which makes diagnosis and management difficult. Good clinical care of patients with CD should include surveillance for micronutrient deficiencies and in respective cases a consequent treatment and supplementation |
| Dignass et al., 2015258 | ECCO Guidelines |  |  |  | Guideline for diagnosis, management, treatment of anemia in IBD |
| Aghdassi et al., 2003219 | Randomized controlled trial | Humans | Oxidatively stressed CD subjects (*n*░=░57) | People were supplemented with vitamins E (800░IU) and C (1000░mg) or their placebo for 4 wk | During supplementation, plasma vitamin C and alpha-tocopherol increased and all indices of oxidative stress decreased significantly. Disease activity remained stable |
| Yakut et al., 2010233 | Clinical study | Humans | 138 patients with IBD (45 Crohn's disease and 93 ulcerative colitis) and 53 healthy subjects | Evaluation of serum vitamin B12 and folate deficiency | The number of patients with vitamin B12 deficiency in the CD group was greater than the number of patients with UC or controls and With regard to folate levels, the median serum folate level was 7.7░±░5.3░ng/ml in CD patients, 8.6░±░8.3░ng/ml in UC patients and 9.9░±░3.3░ng/ml in the control group (*P*░=░n.s.) |
| Kuwabara et al., 2009228 | Clinical study | Humans | Seventy patients with IBD | Vitamin K and D deficiency in the pathogenesis of decreased BMD in IBD | Multiple regression analyses revealed that low plasma concentrations of vitamin K and 25OH-D were independent risk factors for low BMD and that they were associated with the patients’ fat intake, but not with their intake of these vitamins |
| Ojuawo and Keith, 2002264 | Prospective cross-sectional study | Humans | 74 children with IBD (38UC and 36 CD) and 40 controls | Serum levels of zinc, copper and selenium in children with IBD | The serum levels of selenium were significantly lower in cases of ulcerative colitis and Crohn’s disease than in the controls (*P*░<░0.01). The serum copper concentration was significantly higher in those with Crohn’s disease than in those with ulcerative colitis and the controls (*P*░<░0.01). Children with Crohn’s disease had a lower serum zinc level compared to the control. but the levels were not significantly different in the controls and ulcerative colitis (*P*░>░0.10) |
| Fransen et al., 2013221 | Case – control study | Humans | 1378 Swedish patients with IBD, 871 with CD and 507 with UC, were recruited | DNA extraction and evaluation of polymorphism | Homozygous carriers of the major (T) allele, relative to homozygous carriers of the minor (C) allele, of the CYP26B1 polymorphism rs2241057 may have an increased risk for the development of CD, which possibly may be due to elevated levels of retinoic acid |
| Han et al., 2017263 | Clinical study | Humans (Korean population) | 83 patients with IBD – Thirty-four (41.0%) were diagnosed with CD and 49 (59.0%) were diagnosed with ulcerative colitis | Blood testing | Seventy-four patients (89.2%) had suboptimal levels of serum 25-(OH)D and female sex, age younger than 40 years, and diagnosis of CD were possible risk factors for vitamin D deficiency. patients younger than 40 years were at increased risk for zinc deficiency Female sex and low serum albumin levels were independent risk factors for selenium deficiency by multivariate logistic regression analysis |
| Heyman et al., 2009235 | Clinical study | Humans (children) | Folate concentrations were measured in 78 children: 37 with newly diagnosed, untreated IBD (22 with CD, 11 with UC, and 4 with IC) and 41 healthy controls – Patients were enrolled at the time of initial IBD diagnoses and included children with ulcerative colitis (UC), CD, and indeterminate colitis (IC) | Red blood cell folate (RBCF) and whole-blood folate (WBF) concentrations were evaluated | Higher folate concentrations in children with newly diagnosed untreated IBD than in controls |
| Galland, 1988268 | Review |  |  |  | Parenteral Mg requirements in patients with IBD are at least 120░mg/day or more; oral requirements may be as great as 700░mg/day |
| Siva et al., 2017266 | Prospective study | Humans | 773 patients with CD and 223 with UC | Rates of IBD-related surgeries or hospitalizations or complications were evaluated | Zn deficiency was associated with an increased risk of subsequent hospitalizations, surgeries, and disease-related complications and normalization of zinc was associated with improvement of these outcomes |
| Erzin et al., 2008241 | Prospective study | Humans | 105 patients with IBD (57 UC and 48 CD) and 85 healthy patients. 16 with UC and 19 with CD were in active phase of disease – no intestinal resection – 11 patients had a history of thromboembolism | Concentration of cobalamin, folate, homocysteine and pyridoxine | IBD patients have higher levels of homocysteine |
| Koutroubakis et al., 2000244 | Cohort study | Humans | Greek patients – 108 fasting IBD patients(53 UC and 55 CD) and 74 healthy controls | Interview and evaluation of serum concentrations | Hyperhomocysteinemia is common in Greek IBD patients |
| Mahmood et al., 2005246 | Clinical study | Humans | 68 patients attending the IBD clinic | Evaluation of concentrations | Higher homocysteine level in IBD patients |
| Huang et al., 2017 234 | Clinical study | Humans | 257 patients with IBD (195 CD and 62 UC) | Evaluation of concentrations | In CD patients, the mean serum vitamin B12 and folate concentrations were 359.53░±░170.08░pg/ml and 7.11░±░4.75░ng/ml, respectively. These two values were significantly lower than in the UC patients and controls. There were no significant differences between the serum vitamin B12 and folate statuses of the UC and control patients. Regarding CD patients, those with prior ileal or ileocolic resection showed a higher prevalence of abnormal vitamin B12 levels than those without prior resection. In CD patients, a disease duration within 5 years was a risk factor of abnormal folate levels |
| Santucci et al., 2014267 | Retrospective chart review | Humans | 61 patients with IBD | Patients were supplemented with a daily multivitamin and mineral | Zn deficiency requires more aggressive supplementation |
| Saibeni et al., 2003230 | Clinical study | Humans | 61 IBD patients: 32 with Crohn’s disease and 29 with ulcerative colitis | Plasma levels of vitamin B6 | Median vitamin B6 levels were significantly lower in IBD patients than in controls and low vitamin B6 levels were significantly more frequent in patients with active disease than in patients with quiescent disease |
| Shaghaghi et al., 2014218 | Cohort study | Humans – vitro | Genomic DNA samples from patients with CD (*n*░=░162) and UC (*n*░=░149) and ethnically matched controls (*n*░=░142) were genotyped for 3 SLC23A1 polymorphisms (rs6596473, rs33972313, and rs10063949) | Genotypization | Variation at rs10063949 (G allele for heterozygote and homozygote) was associated with increased susceptibility to CD |
| Bousvaros et al., 1998222 | Prospective study | Humans | Ninety-seven patients with inflammatory bowel disease (61 with CD, 36 with UC) under observation in the inflammatory bowel disease program Twenty-three children and young adults with gastrointestinal illness but no evidence of inflammatory bowel disease as controls | Evaluation of serum levels | Hypovitaminosis A (serum level < 20░g/dl) was present in 14 (14.4%) of the 97 IBD patients – In the CD population, only 1 of 26 patients with inactive disease (as defined by a Hyams PCDAI score of <= 10) had a low serum levels of vitamins A or E. However, 19% of CD patients with mild activity and 36% of patients with moderate to severe activity had a low vitamin A or vitamin E level  The prevalence of low serum vitamin A or vitamin E levels in patients with UC was 42.8% (3 of 7 patients) in moderate to severe colitis, 0% (0 of 10 patients) in mildly active colitis, and 15.8% (3 of 19) in patients with inactive colitis |
| Akkermans et al., 2016259 | Clinical trial | Humans | 59 pediatric IBD patients | Evaluation of iron status with | The prevalence of IDA (iron deficiency anemia) and ACD (anemia of chronic disease) was 27.1% (16/59) and 20% (8/40) respectively |
| Pan et al., 2017240 | Meta-analysis | Humans | Studies from 1970 to December 2016 |  | The serum folate concentrations in patients with IBD were lower than those in healthy controls, and low serum concentrations of folic acid may be an important risk factor for IBD patients |
| Oussalah et al., 2011242 | Meta-analysis | Humans | Studies from 1966 to 2011 and included all studies that evaluated plasma homocysteine level in IBD |  | IBD patients had higher plasma homocysteine Level (PHL) than controls. Moreover, IBD patients have an increased risk of hyperhomocysteinaemia |
| Romagnuolo et al., 2001245 | Cross-Sectional study | Humans | 65 IBD patients and 138 controls | Evaluation of serum levels | Of the 10 IBD patients with hyperhomocysteinemia only 2 had vitamin B12 deficiency |
| Zintzaras, 2010243 | Systematic study | Humans | 13 studies provided 1849 IBD cases and 2249 controls were evaluated |  | Only the MTR A2756G gene polymorphism showed an association with the risk of IBD |
| Nakano et al., 2003 | Cross-sectional study | Humans | 43 patients with IBD (27 Crohn disease, 9 ulcerative colitis, and 7 indeterminate colitis) and 46 control subjects from a pediatric gastroenterology clinic | Serum evaluation | Plasma tHcy concentrations were higher in children with IBD than in control subject |

Table 19 Probiotics and IBD.

| Authors | Type of study | Vitro animals–humans | Subjects | Dietary products used | Results |
| --- | --- | --- | --- | --- | --- |
| Guslandi, 2015274 | Review |  |  |  | Combined administration of probiotics and of standard pharmacological therapy can provide better results in subjects with pouchitis |
| Lichtenstein et al., 2016272 | Review |  |  |  | Probiotics confer little benefit in inducing clinical remission in Crohn's patients. With the possible exception of *S. boulardii* in certain populations (*e.g*., non-smokers), long-term treatment by probiotic microorganisms shows no benefit in maintaining medically achieved remission in patients with either colonic or ileo-colonic luminal Crohn's disease. *S. boulardii* could be more successful than other probiotic agents in maintaining medically achieved remission |
| Lauranne et al., 2016273 | Review |  |  |  | Overwhelming evidence supports the involvement of the intestinal microbiota in the pathogenesis of IBD. VSL#3 may be considered for remission induction of mild-to-moderate UC, as an adjunctive to current standard therapies such as oral mesalamine. E. Coli Nissle 1917 may be considered for maintenance of UC remission as non-inferiority was shown compared to oral mesalamine. Evidence for efficacy of prebiotics in UC is still insufficient |
| Souza et al., 2016275 | Clinical Study | Murine Model | Conventional 6–8 week-old female BALB/c mice and GF 6–8 week-old female BALB/c mice | Ingestion of *E. coli* strain Nissle 1917 | Was observed reduced inflammation, as assessed by reduced levels of neutrophils, eosinophils, chemokines and cytokines. Increase in the number of regulatory T-cells in Peyer's patches |
| Scaldaferri et al., 2016276 | Review |  |  |  | EcN, a well-known probiotic, is equivalent to mesalazine in the maintenance of remission in UC |
| Naidoo et al., 2011270 | Review |  | Randomized controlled trials (RCTs) that compared probiotics against placebo or any other intervention for the maintenance of remission in ulcerative colitis were eligible for inclusion |  | there is insufficient evidence to make conclusions about the efficacy of probiotics for maintenance of remission in UC |
| Rolfe et al., 2006269 | Review |  | Randomized controlled trials of probiotic therapy were included |  | There is no evidence to suggest that probiotics are beneficial for the maintenance of remission in CD |
| Fujiya et al., 2014271 | Systematic Review |  | High-quality randomized controlled trials (RCTs) which investigated the therapeutic effects of probiotics on IBD were included |  | A further analysis evaluating the effects of probiotic treatments in IBD is needed to clarify the optimal probiotics and treatment regimens for each condition or population in IBD patients |
| Dignass et al., 2010278 | European evidence-based consensus |  |  |  | There is no enough evidence to suggest that probiotics are beneficial for the maintenance of remission in Crohn's disease |
| Dignass et al., 2012277 | European evidence-based consensus |  |  |  | *E. coli* Nissle is an effective alternative to 5-ASA for maintenance |
